# Supplementary material
Source: PubMed Central journal article supplement (PMC7781100)
Supplement: NEJMoa2033130_appendix.pdf [file NEJMoa2033130_appendix.pdf]

## Supplementary Appendix

This appendix has been provided by the authors to give readers additional information about their work.

Supplement to: ACTIV-3/TICO LY-CoV555 Study Group. A neutralizing monoclonal antibody for hospitalized patients with Covid-19. N Engl J Med. DOI: [10.1056/NEJMoa2033130](https://doi.org/10.1056/NEJMoa2033130)

(PDF updated December 31, 2020)

## Table of Contents

|                                                                                                                                                                |    |
|----------------------------------------------------------------------------------------------------------------------------------------------------------------|----|
| Section 1: TICO Study Group.....                                                                                                                               | 3  |
| Section 2: Methods .....                                                                                                                                       | 8  |
| Section 3: Results.....                                                                                                                                        | 14 |
| Figure S1: CONSORT diagram .....                                                                                                                               | 18 |
| Table S1: Additional Baseline Characteristics by Treatment Group.....                                                                                          | 19 |
| Table S2: Concomitant Treatments Prescribed at Day 5 .....                                                                                                     | 21 |
| Table S3: Impact of Covariate Adjustment on Major Outcomes .....                                                                                               | 22 |
| Table S4: Summary of Odds Ratios from Proportional Odds Model by Day of Follow-up for the<br>Pulmonary and Pulmonary+ Ordinal Outcomes by Treatment Group..... | 23 |
| Table S5a. Association Between the Day 5 Pulmonary Ordinal Outcome and Time to Sustained<br>Recovery.....                                                      | 24 |
| Table S5b. Time to Sustained Recovery by Category of the Day 5 Pulmonary Ordinal Outcome<br>.....                                                              | 24 |
| Table S6: End Organ Disease Events and Serious Infections through October 26 by Treatment<br>Group.....                                                        | 25 |
| Table S7: Signs and Symptoms Reported During and 2 Hours Post-Infusion by Treatment Group<br>.....                                                             | 26 |
| Table S8: Summary of Components of Primary Safety Outcome at Day 5 .....                                                                                       | 27 |
| Table S9: Summary of Components of Primary Safety Outcome, including Organ Failure and<br>Serious Infections at Day 28 by Treatment Group.....                 | 28 |
| Figure S2 (A-D): Kaplan-Meier plots for 4 safety outcomes. ....                                                                                                | 29 |
| Table S10: Deaths, SAEs and New Grade 3 and 4 Adverse Events through Day 28 by MedDRA<br>System Organ Class and Treatment Group .....                          | 30 |
| Table S11: Changes in Laboratory Measures from Baseline to Day 5 by Treatment Group .....                                                                      | 31 |
| Figure S3: Category of Pulmonary Ordinal Outcome at Day 5 According to Category at Baseline<br>by Treatment Group .....                                        | 32 |
| Table S12: Change in Category of Pulmonary Ordinal Outcome at Day 5 According to Category<br>at Baseline by Treatment Group.....                               | 34 |
| Table S13: Subgroup Analysis for Day 5 Pulmonary Ordinal Outcome.....                                                                                          | 35 |

## Section 1: TICO Study Group

U.S. National Institute of Allergy and Infectious Diseases incl. Department of Clinical Research. H. Clifford Lane, *M.D.*, John Tierney, *B.Sc.N.*, Elizabeth S. Higgs, *M.D., D.M.T.H., M.I.A.*, Kevin Barrett, *R.N., B.Sc.N.*, Betsey R. Herpin, *M.Sc.N., C.C.R.C., R.N.*, Mary C. Smolskis, *B.Sc.N., M.A.*, Susan E. Vogel, *R.N., B.Sc.N.*, Laura A. McNay, *M.Sc.*, Kelly Cahill, *R.N., M.Sc., C.C.R.C., R.A.C.*, Page Crew, *Pharm.D., M.P.H., B.C.P.S.*, Matthew Kirchoff, *Pharm.D., M.Sc., M.B.A.*, Ratna Sardana, *B.A.*, Sharon Segal Raim, *M.P.H.*

Foundation for the National Institutes of Health. The Accelerating COVID-19 Therapeutic Interventions and Vaccines (ACTIV) and Operation Warp Speed. Stacey J. Adam, *Ph.D.*, Judy Currier, *M.D.*, Sarah Read, *M.D.*, Eric Hughes, *M.D., Ph.D.*, Rachel H. Harrigan, *M.D.*

INSIGHT SDMC, Division of Biostatistics, School of Public Health and School of Statistics, University of Minnesota, Minneapolis, MN, USA. James D. Neaton, *Ph.D.*, Laura Amos, Anita Carter, Gary Collins, *M.S.*, Bionca Davis, *M.P.H.*, Eileen Denning, *M.P.H.*, Alain DuChene, Nicole Engen, *M.S.*, Greg Grandits, *M.S.*, Birgit Grund, *Ph.D.*, Merrie Harrison, Nancy Hurlbut, Joseph Koopmeiners, *Ph.D.*, Gregg Larson, *M.A.*, Sue Meger, Shweta Sharma Mistry, *M.S.*, Thomas Murray, *Ph.D.*, Ray Nelson, *R.N.*, Kien Quan, *M.S.*, Siu Fun Quan, Cavan Reilly, *Ph.D.*, Greg Thompson, David Vock, *Ph.D.*, Deborah Wentworth, *M.P.H.*

Cardiothoracic Surgical Trials Network (CTSN) International Coordinating Center (ICC). Icahn School of Medicine at Mount Sinai, New York, USA. Annetine C. Gelijns, *Ph.D.*, Alan J. Moskowitz, *M.D.*, Emilia Bagiella, *Ph.D.*, Ellen Moquete, *R.N., B.Sc.N.*, Karen O'Sullivan, *M.P.H.*, Evan Accardi, *B.A.*, Emily Kinzel, *M.P.H.*, Gabriela Bedoya, Lopa Gupta, *M.P.H.*, Jessica R. Overbey, *Dr.P.H.*, Maria L. Padillia, *M.D.*, Milerva Santos, *M.P.A.*  
CTSN Steering Committee Chair, Cleveland Clinic Foundation, Marc A. Gillinov, M.D.  
U.S. National Heart Lung and Blood Institute. Marissa A. Miller, *D.V.M., M.P.H.*, Wendy C. Taddei-Peters, *Ph.D.*, Kathleen Fenton, *M.D., M.S.*

Duke University Hospital (71 participants enrolled). Peter K. Smith, *M.D.*, Christina E. Barkauskas, *M.D.*, Andrew M. Vekstein, *M.D.*, Emily R. Ko, *M.D., Ph.D.*, Tatyana Der, *M.D.*, John Franzone, *M.D.*, Noel Ivey, *M.D.*, Thomas L. Holland, *M.D.*, Kathleen Lane, *B.Sc.N., R.N.*, Andrew Bouffler, *B.Sc.*, Lauren M. McGowan, *B.Sc., E.M.T.B.*, Ben Stallings, Jennifer Stout, *B.Sc.*, Whitney Franz, *B.Sc., R.N.*, Beth McLendon-Arvik, *Pharm.D.*, Beth A. Hollister, *B.Sc.N., R.N.*, Dana M. Giangiacomo

Baylor, Scott and White Health (68 participants enrolled). Uriel Sandkovsky, *M.D., M.Sc.*, Robert L. Gottlieb, *M.D., Ph.D.*, Michael Mack, *M.D.*, Mezgebe Berhe, *M.D., M.P.H.*, Clinton Haley, *M.D., M.P.H.*, Emma Dishner, *M.D., M.P.H.*, Christopher Bettacchi, *M.D.*, Kevin Golden, *M.D.*, Erin Duhaime, *P.A.-C.*, Cedric Spak, *M.D., M.P.H.*, Sarah Burris, Felecia Jones, Samantha Villa, Samantha Wang, Raven Robert, Tanquinisha Coleman, Laura Clariday, Rebecca Baker, Mariana Hurutado, Nazia Iram, Michelle Fresnedo, Allyson Davis, Kiara Leonard, Noelia Ramierez, Jon Thammavong, Krizia Duque, Emma Turner, Aaron Killian, *Pharm.D.*, Adriana Palacios, *PharmD*, Edilia Solis, Janet Jerrow, Matthew Watts, Heather Whitacre, Elizabeth Cothran

University of Southern California (10 participants enrolled). Michael E. Bowdish, *M.D., M.Sc.*, Zea Borok, *M.B., Ch.B.*, Noah Wald-Dickler, *M.D.*, Douglass Hutcheon, *M.D.*, Amytis Towfighi, *M.D.*, May Lee, *M.D.*, Meghan R. Lewis, *M.D.*, Brad Spellberg, *M.D.*, Linda Sher, *M.D.*, Aniket Sharma, *M.D.*, Anna P. Olds, *M.D.*, Chris Justino, *P.A.-C.*, Edward Lozano, *M.D.*, Chris Romero, *C.R.C.*, Janet Leong, *C.R.C.*, Valentina Rodina, *M.D.*, Christine Quesada, *C.R.C.*, Luke Hamilton, Jose Escobar

Emory University (9 participants enrolled). Brad Leshnower, *M.D., F.A.C.S.*, William Bender, *M.D., M.P.H.*, Milad Sharifpour, *M.D., M.Sc.*, Jeffrey Miller, *M.D.*, Kim T. Baio, *R.N., M.Sc.N.*, Mary K. McBride, *R.N., B.Sc.N., M.A.S.*, Michele Fielding, *R.N., B.Sc.N., C.C.R.C.*, Sonya Mathewson, *R.N., B.Sc.N., C.C.R.C.*, Kristina Porte, *B.A.*, Missy Maton, *R.N., B.Sc.N.*, Chari Ponder, *R.N., B.Sc.N.*, Elizabeth Haley, *R.N., B.Sc.N., C.C.R.N.*, Christine Spainhour, *R.N., C.C.R.C.*, Susan Rogers, *R.Ph.*, Derrick Tyler, *C.C.R.P.*

University of Virginia Health Systems (1 participant enrolled). Jeffrey M. Sturek, *M.D., Ph.D.*, Andrew Barros, *M.D., M.Sc.*, Kyle B. Enfield, *M.D., F.C.C.M., F.S.H.E.A.*, China J. Green, *B.Sc., C.C.R.C.*, Rachel M. Simon, *R.N., B.Sc.N., C.C.R.C.*, Kara Thornton, *Pharm.D., M.Ed., C.C.R.P.*

Ochsner Clinic. Patrick E. Parrino, *M.D., F.A.C.S.*, Stephen Spindel, *M.D.*, Aditya Bansal, *M.D.*, Katherine Baumgarten, *M.D., F.A.C.P., F.I.D.S.A.*, Jonathan Hand, *M.D.*, Derek Vonderhaar, *M.D.*, Bobby Nossaman, *M.D.*,

Sylvia Laudun, *D.N.P., M.B.A., R.N., CPHQ*, DeAnna Ames, *M.Sc.*, GERALYN ISAAC, *Pharm.D.*, Huan Dinh, *Pharm.D.*, Yiling Zheng, *Pharm.D.*, Hunter McDaniel, *Nicolle Crovetto, M.Sc.*, Abby Richardson West Virginia University. Vinay Badhwar, *M.D.*, J. Awori Hayanga, *M.D., M.P.H.*, Sunil Sharma, *M.D.*, Brian Peppers, *D.O.*, Paul McCarthy, *M.D.*, Troy Krupica, *M.D.*, Arif Sarwari, *M.D., M.Sc., M.B.A.*, Rebecca Reece, *M.D.*, Lisa Fornaresio, *Ph.D.*, Chad Glaze, *M.Sc.*, Raquel Evans, *B.Sc.N., R.N.*, Fang Di, *R.N., M.Sc.N.*, Shawn Carlson, *M.D., M.Sc.*, Tanja Aucremanne, *B.Sc.N., R.N.*, Connie Tennant, *B.Sc.N., R.N.*, Lisa Giblin Sutton, *Pharm.D.*, Sabrina Buterbaugh, *Pharm.D.*, Roger Williams, *C.Ph.T.*, Robin Bunner, *B.Sc.* University of Maryland. Ronson J. Madathil, *M.D.*, Joseph Rabin, *M.D.*, Andrea Levine, *M.D.*, Kapil Saharia, *M.D.*, Ali Tabatabai, *M.D.*, Christine Lau, *M.D., M.B.A.*, James S. Gammie, *M.D.*, Maya-Loren Peguero, Kimberly McKernan, Matthew Audette, Emily Fleischmann, Kreshta Akbari, *M.Sc.*, Myounghee Lee, *Ph.D., Pharm.D.*, Andrew Chi, *Pharm.D.*, Hanna Salehi, *Pharm.D.*, Alan Pariser, *Pharm.D.*, Phuong Tran Nyguyen, *Pharm.D.*, Jessica Moore, Adrienne Gee, Shelika Vincent Dartmouth-Hitchcock Medical Center. Richard A. Zuckerman, *M.D., M.P.H.*, Alexander Iribarne, *M.D., M.Sc.*, Sara Metzler, *B.Sc.N., R.N.*, Samantha Shipman, *B.Sc.N., R.N.*, Taylor Caccia, *B.A.*, Haley Johnson, Crystallee Newton, *B.A., C.C.R.C.*, Doug Parr, *Pharm.D.* Lutheran Medical Group. Vicente Rodriguez, *M.D.*, Gordon Bokhart, *Pharm.D.*, Sharon M. Eichman

Prevention and Early Treatment of Acute Lung Injury (PETAL) ICC. Massachusetts General Hospital, Boston, USA. B. Taylor Thompson *M.D.*, Crystal North *M.D.*, Cathryn Oldmixon *R.N.*, Nancy Ringwood *B.Sc.N.*, Laura Fitzgerald *B.A./B.Sc.*, Ariela Muzikansky *R.N., B.A./B.Sc.*, Richard Morse *B.A./B.Sc.* PETAL Steering Committee Chairperson: Johns Hopkins University. Roy G. Brower, *M.D.* U.S. National Heart Lung and Blood Institute. Lora A. Reineck *M.D., M.S.*, Neil R. Aggarwal, *M.D.*

ALIGN Site Coordinating Center (SCC). Lead Investigators, Baystate Medical Center: Jay Steingrub, *M.D.*, Brigham and Women's Hospital: Peter Hou *M.D.*

Baystate Medical Center: Jay S. Steingrub, *M.D.*, Mark A. Tidswell, *M.D.*, Lori-Ann Kozikowski, *R.N., B.Sc.N., C.C.R.N.*, Cynthia Kardos, *R.N., B.Sc.N.*, C.C.R.N., Leslie De Souza

Boston SCC. Lead Investigators. Beth Israel Deaconess Medical Center: Daniel Talmor, *M.D.* and Nathan Shapiro, *M.D.*

University of Mississippi (2 participants enrolled): Alan E. Jones, *M.D.*, James Galbraith, *M.D.*, Utsav Nandi, *M.D.*, Rebekah Peacock, *R.N.*

Massachusetts General Hospital: Michael R. Filbin, *M.D., M.Sc.*, Kathryn Hibbert, *M.D.*, Blair Alden Parry, *C.C.R.A., B.A.*, Justin D. Margolin, *B.Sc.*, Kelsey Brait, *B.B.A., B.Sc.*

California SCC, Lead Investigators. University of California San Francisco: Michael A. Matthay, *M.D.*, David Geffen School of Medicine at UCLA: Gregory Hende, *M.D.*

University of California San Francisco. University of San Francisco Mount Zion (4 participants enrolled): Michael A. Matthay, *M.D.*, Kirsten N. Kangelaris, *M.D.*, M.A.S., Kimberly J. Yee, *B.Sc.*, Alejandra E. Jauregui, *B.A.*, Hanjing Zhuo, *M.P.H.*

University of California Fresno (2 participants enrolled): Eyad Almasri, *M.D.*, Alyssa R. Hughes, *B.Sc.*, Rebekah L. Garcia, *C.C.R.P.*, Kinsley A. Hubel, *M.D.*

Stanford University (1 participant enrolled): Angela J. Rogers, *M.D.*, Jennifer G. Wilson, *M.D., M.Sc.*, Rosemary Vojnik, *B.Sc.*, Jonasel Roque *B.Sc.*

University of Texas Health Science Center: Henry Wang, *M.D., M.Sc.*, Ryan M. Huebinger, *M.D.*, Bela Patel, *M.D.*, Elizabeth Vidales, *M.P.H., B.M.Sc.*

Colorado SCC, Lead Investigators. University of Colorado Hospital: Adit A. Ginde, *M.D., M.P.H.*, Marc Moss, *M.D.* University of Colorado Hospital (5 participants enrolled): Adit A. Ginde, *M.D., M.P.H.*, Amiran Baduashvili, *M.D.*, Lakshmi Chauhan, *M.D.*, David J. Douin, *M.D.*, Lani L. Finck, *B.A.*, Carrie Higgins, *R.N.*, Michelle Howell, *R.N.*, Jeffrey McKeehan, *M.Sc.N.*, Marc Moss, *M.D.*

National Jewish Health/St. Joseph Hospital: James H. Finigan, *M.D.*, William Janssen, *M.D.*, Peter Stubenrauch, *M.D.*, Christine Griesmer, *R.N., B.Sc.N., M.P.H.*

Michigan SCC, Lead Investigators: University of Michigan: Robert C. Hyzy, *M.D.*, Pauline K. Park, *M.D.*

University of Michigan (2 participants enrolled): Robert C. Hyzy, *M.D.*, Pauline K. Park, *M.D.*, Kristine Nelson, *R.N.*, Kelli McDonough, Jake I. McSparron, *M.D.*, Ivan N. Co, *M.D.*, Bonnie R. Wang, *M.D.*, Shijing Jia, *M.D.*, Barbara Sullins, Sinan Hanna, Norman Olbrich

Montefiore-Sinai SCC, Lead Investigators: Montefiore Medical Center: Michelle N. Gong, *M.D.*, Mount Sinai Hospital: Lynne D. Richardson, *M.D.*

Montefiore Medical Center Moses, Montefiore Medical Center Weiler: Michelle N. Gong, *M.D.*, M.S, Rahul Nair, *M.D.*

Banner University Medical Center Tucson: Jarrod M. Mosier, *M.D.*, Cameron Hypes, *M.D.*, Elizabeth Salvagio Campbell, *Ph.D.*, Billie Bixby, *M.D.*, Christian Bime, *M.D.*, Sairam Parthasarathy, *M.D.*

Ohio SCC, Lead Investigators: University of Cincinnati: R. Duncan Hite, *M.D.*, Ohio State University: Thomas E. Terndrup, *M.D.*, Cleveland Clinic Foundation: Herbert P. Wiedemann, *M.D.*, *M.B.A.*

Cleveland Clinic Foundation, Cleveland Clinic Fairview Hospital, Cleveland Clinic Marymount Hospital (2 participants enrolled): Abhijit Duggal, *M.D.*, Siddharth Dugar, *M.D.*, Debasis Sahoo, *M.D.*, Kiran Ashok, *B.Sc.*, Alexander H. King, *M.Sc.*, Omar Mehkri, *M.D.*

Pacific Northwest SCC, Lead Investigators: Oregon Health and Science University: Catherine L. Hough, *M.D.*, University of Washington Medical Center: Bryce H. Robinson, *M.D.*

Harborview Medical Center, University of Washington Medical Center: Nicholas J. Johnson, *M.D.*, Bryce H. Robinson, *M.D.*, Stephanie J. Gundel, *R.D.*, Sarah C. Katsandres, *B.Sc.*

Oregon Health and Science University: Catherine L. Hough, *M.D.*, Akram Khan, *M.D.*, Olivia F. Krol, Mistry Kinjal, Milad K. Jouzestani

Cedars-Sinai Medical Center: Peter Chen, *M.D.*, Sam S. Torbati, *M.D.*, Yuri Matusov, *M.D.*, June Choe, *M.D.*, Niree A. Hindoyan, *B.Sc.*, Susan E. Jackman, *B.Sc.N.*, *M.Sc.*, Emad Bayoumi, *M.B.A.*, Timothy Wynter, *B.Sc.*, Antonina Caudill, *M.P.H.*, *C.P.H.*, Ethan Pascual, *M.A.*, Gregg J. Clapham, *M.A.*, Lisa Herrera

Southeast SCC, Lead Investigators: Wake Forest Baptist Health: D. Clark Files *M.D.*, Chadwick Miller *M.D.*

Wake Forest Baptist Health (19 participants enrolled): D. Clark Files, *M.D.*, Keven W. Gibbs, *M.D.*, Lori S. Flores, *D.N.P.*, Mary E. LaRose, *R.N.*, *B.Sc.N.*, Leigha D. Landreth, *R.N.*, *B.S.N.*

University of Kentucky: Peter E. Morris, *M.D.*, Jamie L. Sturgill, *Ph.D.*, Evan P. Cassity, *M.Sc.*, Sanjay Dhar, *M.D.*, Ashley A. Montgomery-Yates, *M.D.*, Sara N. Pasha, *M.D.*, Kirby P. Mayer, *Ph.D.*

Virginia Commonwealth University: Marjolein de Wit, *M.D.*, *M.Sc.*, Jessica Mason, *M.P.H.*

Utah SCC, Lead Investigators: Intermountain Medical Center: Samuel M. Brown, *M.D.*, Joseph Bledsoe, *M.D.*

Intermountain Medical Center (23 participants enrolled): Kirk U. Knowlton, *M.D.*, Samuel Brown, *M.D.*, Michael Lanspa, *M.D.*, Lindsey Leither, *M.D.*, Ithan Pelton, *M.D.*, Brent P. Armbruster, *B.Sc.*, Quinn Montgomery, *B.Sc.*, *AEMT*, Darrin Applegate, *B.Sc.*, Naresh Kumar, *M.P.H.*, *C.C.R.P.*, Melissa Fergus, *B.Sc.*, Katie Brown, *B.Sc.*, *R.N.*, Mardee Merrill, *B.Sc.*, *C.C.R.P.*, Erna Serezlic, *B.Sc.*, Ghazal Palmer, *Pharm.D.*, Brandon Webb, *M.D.*, Valerie T. Aston, *M.B.A.*, *R.R.T.*, *C.C.R.P.*

University of Utah (5 participants enrolled): Estelle S. Harris, *M.D.*, Elizabeth A. Middleton, *M.D.*, Macy A.G. Barrios, *B.Sc.*, Jordan Greer, *B.Sc.*, Amber D. Schmidt, *B.Sc.*, Melissa K. Webb, *Pharm.D.*, Robert Paine, *M.D.*, Sean J. Callahan, *M.D.*

Vanderbilt SCC, Lead Investigators: Vanderbilt University Medical Center: Wesley H. Self *M.D.*, *M.P.H.*, Todd W. Rice *M.D.*, *M.S.C.I.*

Vanderbilt University Medical Center (23 participants enrolled): Wesley H. Self *M.D.*, *M.P.H.*, Todd W. Rice *M.D.*, *M.S.C.I.*, Jonathan D. Casey *M.D.*, *M.S.C.I.*, Jakea Johnson *M.P.H.*, Christopher Gray *R.N.*, Margaret Hays *R.N.*, Megan Roth *R.N.*

INSIGHT Washington ICC, Veterans Affairs (VA) Medical Center, Washington DC: Virginia L. Kan, *M.D.*; Adriana Sánchez, *M.Sc.*; Laura Popielski, *M.P.H.*; Heather Rivasplata, *D.N.P.*, *M.P.H.*; Melissa Turner, *M.S.W.*; Michael J. Vjecha, *M.D.*; Amy Weintrob, *M.D.*

University of Texas Southwestern Medical Center, Dallas, TX (12 participants enrolled): Mamta K. Jain, *M.D.*, *M.P.H.*; Tianna Petersen, *M.Sc.*; Claudia Sanchez Lucas, *M.P.H.*; Alexis Avery, *PS.M.*; Laura Hansen, *MA*; Natalie DellaValle, *Pharm.D.*, *B.C.P.S.*; Khanh-Hau Moss, *M.Sc.*, *PharmD.*

Hennepin Healthcare Research Institute, Minneapolis, MN (8 participants enrolled): Jason V. Baker, *M.D.*; Jonathan Klaphake, *B.Sc.*; Shari Mackedanz, *R.N.*; Rachael Goldsmith, *B.Sc.*; Hodan Jibrell, *B.Sc.*

Henry Ford Health System, Detroit, MI (5 participants enrolled): Norman Markowitz, *M.D.*, Erika Pastor, *R.N.*; Mayur Ramesh *M.D.*; Indira Brar, *M.D.*; Emanuel Rivers *M.D.*

Denver Public Health, Denver, CO (5 participants enrolled): Edward Gardner, *M.D.*; James Scott, *R.N.*; David Wyles, *M.D.*; Ivor Douglas, *M.D.*; Jason Haukoos, *M.D.*; Mitch Cohen, *M.D.*; Kevin Kamis, *M.P.H.*; Caitlin Robinson, *M.P.H.*

Georgetown University Medical Center, Washington, DC: Princy Kumar, *M.D.*, Maximilian Menna

VA Office of Research & Development: Victoria J. Davey, Ph.D., M.P.H.; VA Cooperative Studies Group (CSP) Site Coordinating Center (SCC): Kousick Biswas, *Ph.D.*; Cristin Harrington, *B.A.*

Michael E. DeBakey VA Medical Center, Houston, TX (4 participants enrolled): Barbara W. Trautner, *M.D., Ph.D.*; Lavannya Pandit, *M.D., M.Sc.*; Yigun Wang, *M.A.*

Miami Bruce Carter VA Health Care System, Miami, FL (3 participants enrolled): Paola Lichtenberger, *M.D.*; Gio Baracco, *M.D.*; Carol Ramos, *M.D.*; Lauren Bjork, *Pharm.D.*; Melyssa Sueiro, *M.Sc.*

San Francisco VA Health Care System, San Francisco, CA: Phyllis Tien, *M.D.*; Heather Freasier, *M.Sc., R.D.*

Bay Pines VA Healthcare System, Bay Pines, FL: Theresa Buck, *M.D.*; Hafida Nekach, *M.D.*

INSIGHT Copenhagen ICC, CHIP (Centre of Excellence for Health, Immunity and Infections), Department of Infectious Diseases, Rigshospitalet, University of Copenhagen, Copenhagen, Denmark. Jens D. Lundgren, *M.D., Ph.D. D.M.Sc.*, Dorthe Raben, *M.Sc.*, Daniel D. Murray, *Ph.D.*, Lars Peters, *M.D., Ph.D. D.M.Sc.*, Bitten Aagaard, *B.Sc.N.*, Charlotte B. Nielsen, Katharina Krapp, *Ph.D.*, Bente Rosdahl Nykjær, Katja Lisa Kanne, *M.Sc. B.Sc.N.*, Anne Louise Grevsen, *M.Sc. Dent.*, Zillah Maria Joensen, *B.Sc.N.*, Tina Bruun, *B.Sc.N.*

#### Denmark.

Copenhagen University Hospital, Amager Hvidovre, Center of Research & Disruption of Infectious Diseases, Department of Infectious Diseases (11 participants enrolled). Thomas Benfield, *M.D.*, Clara Lundtoft Clausen, *M.D.*, Nichlas Hovmand, *M.D.*, Simone Bastrup Israelsen, *M.D.*, Louise Krohn-Dehli, *R.N.*, Cæcilie Leding, *M.D.*, Dorthe Pedersen, *R.N.*, Karen Brorup Pedersen, *M.D.*, Louise Thorlacius-Ussing, *M.D.*, Michaela Tinggaard, *M.D.*, Sandra Tingsgård, *M.D.*, Signe Villadsen, *R.N.*

Herlev-Gentofte Hospital, Respiratory Medicine Section, Department of Internal Medicine (8 participants enrolled). Jens-Ulrik Stæhr Jensen, *M.D., Ph.D.*, Dorthe S. Høgsberg, *R.N.*, Christian P. Rønn, *M.D.*, Ema Rastoder, *M.D.*, Christian Søborg, *M.D., Ph.D.*, Christina Bergsøe, *B.Sc.*, Nuria M.S. Hissabu, *B.Sc.*, Bodil C. Arp, *B.Sc.*

Aarhus Universitetshospital, Skejby, Aarhus (5 participants enrolled). Lars Østergaard, *M.D., Ph.D. D.M.Sc.*, Nina Breinholt Stærke, *M.D.*

Odense University Hospital, Department of Infectious Diseases (5 participants enrolled). Andreas Arnholdt Pedersen, *M.D.*, Inge K Holden, *M.D., Ph.D.*

Dept. of Infectious Diseases, Rigshospitalet, Copenhagen University Hospital (4 participants enrolled). Marie Helleberg, *M.D. Ph.D., D.M.Sc.*, Jan Gerstoft, *MD, D.M.Sc.*

North Zealand University Hospital, Department of Pulmonary and Infectious Diseases (4 participants enrolled). Tomas O. Jensen, *M.D.*, Birgitte Lindegaard, *M.D.*

Kolding Hospital, Department of Medicine (3 participants enrolled). Birgit Thorup Røge *MD. Ph.D.*

Aalborg University Hospital, Department of Infectious Diseases. Henrik Nielsen, *M.D., D.M.Sc.*

#### Spain.

INSIGHT SCC Spain, Hospital Universitari Germans Trias i Pujol, Badalona. Roger Paredes, *M.D., Ph.D.*, Anna Chamorro, *B.Sc.*, Ariadna Figuerola, *B.Sc.* Maria Exposito, *B.Sc.*

Hospital Universitari Germans Trias i Pujol, Badalona. Roger Paredes, *M.D., Ph.D.*, Lourdes Mateu, *M.D., Ph.D.*, Ana Martínez *B.Sc.*, Adrian Siles *B.Sc.*

Hospital General Universitario Gregorio Marañón, Madrid. Eduardo Fernández-Cruz, *M.D., Ph.D.*, Javier Carbone, *M.D., Ph.D.*, Paco López, *M.D.*

Barcelona Institute for Global Health (ISGlobal), Hospital Clínic - Universitat de Barcelona, Barcelona. José Muñoz, *M.D., Ph.D.*, Daniel Camprubi, *M.D.* Almudena Legarda, *B.VSc.*

Hospital Universitario La Paz, IdiPAZ, Madrid. Jose R Arribas, *M.D.*, Alberto Borobia, *M.D. Ph.D.*, Marta Mora-Rillo, *M.D. Ph.D.*, Irene García García, *M.D.*

Hospital Clínico San Carlos, Madrid. Vicente Estrada, *M.D., Ph.D.*, Noemi Cabello, *M.D.*, Maria Jose Nuñez, *M.D.*

Hospital del Mar, Barcelona. Juan P. Horcajada, *M.D., Ph.D.*, Elena Sendra, *M.D.*, Joan Gómez-Junyent, *M.D.*

INSIGHT Sydney ICC, The Kirby Institute, University of New South Wales, Sydney, Australia. Mark Polizzotto, *M.D., Ph.D.*, Gesalit Cabrera, *B.MSc., M.I.P.H.*, Catherine Carey, *B.A., M.Sc.*, Christina C. Chang, *M.D., Ph.D.*, Sally Hough, *B.Sc.*, Sophie Virachit, *B.Sc., Ph.D.*, Amy Zhong, *B.Sc., M.P.H.*

Tan Tock Seng Hospital, NCID, Singapore (1 participant enrolled). \*surname underlined, Barnaby E. Young, *M.D., Ph.D.*, Chia Po Ying, *M.D.*, Lee Tau Hong, *M.D.*, Ray J. Lin, *M.D.*, David Lye, *M.D.*, Sean Ong, *M.D.*, M.Med., Puah Ser Hon, *M.D.*, Yeo Tsin Wen, *M.D., Ph.*, Diong Shiau Hui B.Bio, *M.Sc., M.M.Sc.*, Juwinda Ongko, *B.Sc.*

INSIGHT London ICC, MRC Clinical Trials Unit at UC, London, UK. Abdel G. Babiker, *Ph.D.*, Sarah L. Pett, *M.D.*, Fleur Hudson, *B.Sc.*, Mahesh KB Parmar, *Ph.D.*, Anna Goodman, *M.D., Ph.D.*, Jonathan Badrock, *B.Sc.*, Adam Gregory, *M.A.*

Greece SCC, National & Kapodistrian University of Athens Medical School. Giota Touloumi, *Ph.D.*, Vicky Gioukari, *B.Sc.*

Uganda SCC, JCRC/MRC/UVRI Uganda Research Unit. Joseph Lutaakome, *M.D.*, Cissy M. Kityo, *M.D.*, Francis Kiweewa, *M.D.*

Eli Lilly and Company, Indianapolis, IN, USA. Paul Klekotka, *M.D., Ph.D.*, Karen Price, *Ph.D.*, Ajay Nirula, *M.D., Ph.D.*

Gilead Sciences, Foster City, CA, USA. Anu Osinusi, *M.D. M.P.H.*, Huyen Cao, *M.D.*

Leidos Biomedical Research, Inc., Frederick, MD, USA. R. Baseler, *M.Sc.*, Marc J. Teitelbaum, *M.D., M.Sc.*, Shelly M. Simpson, *M.Sc.*, Molly J. Buehn, *M.Sc.*, David Vallée, *Pharm.D., M.P.H.*, Vanessa Eccard-Koons, *M.Sc.*, Stacey Kopka, *M.Sc.*, Theresa M. Engel, *M.F.S.*, Cynthia Osborne, *B.Sc.*, Leah Giambarresi MacDonald, *M.Sc., R.A.C.*, Liam M. Harmon, *C.C.R.A.*, Denise M. Shelley, *M.Sc.*, Mi Ha Kim, *Ph.D., C.C.R.P.*, Joy Beeler-Knights, *M.P.H., C.C.R.A., A.C.R.P.-C.P.M.*, Lindsey Yeon, Robin L. Dewar, *Ph.D.*, Helene C. Highbarger, *M.Sc.*, Perrine Lallemand, *B.S.*

Advanced Biomedical Laboratories, LLC., Cinnaminson, NJ, USA. Amanda Kubernac, Bhakti Patel, Kenneth Smith, Robert Kubernac, Norman P. Gerry, *Ph.D.*, Marie L. Hoover, *Ph.D.*

PCI Pharma Services. Craig Brown, Nadine DuChateau, Adam Flosi, Les Johnson, Amy Treagus, and Christine Wenner.

## Section 2: Methods

The complete inclusion and exclusion criteria from the protocol are given below.

### Inclusion Criteria

- Age  $\geq$  18 years;
- Informed consent by the patient or the patient's legally-authorized representative
- SARS-CoV-2 infection, documented by PCR or other nucleic acid test (NAT) within 3 days prior to randomization OR documented by NAT more than 3 days prior to randomization AND progressive disease suggestive of ongoing SARS-CoV-2 infection per the responsible investigator;
- Duration of symptoms attributable to COVID-19  $\leq$  12 days per the responsible investigator;
- Requiring admission for inpatient hospital acute medical care for clinical manifestations of COVID-19, per the responsible investigator, and NOT for purely public health or quarantine purposes.

### Exclusion Criteria

- Prior receipt of
  - Any SARS-CoV-2 hVIG, convalescent plasma from a person who recovered from COVID-19 or
  - SARS-CoV-2 nMAb at any time prior to hospitalization;
- Not willing to abstain from participation in other COVID-19 treatment trials until after Day 5;
- In the opinion of the responsible investigator, any condition for which, participation would not be in the best interest of the participant or that could limit protocol-specified assessments;
- Expected inability to participate in study procedures;
- Women of child-bearing potential who are not already pregnant at study entry and who are unwilling to abstain from sexual intercourse with men or practice appropriate contraception through Day 90 of the study.
- Men who are unwilling to abstain from sexual intercourse with women of child-bearing potential or who are unwilling to use barrier contraception through Day 90 of the study.
- **[stage 1 only]** Presence at enrollment of any of the following:
  - a. stroke
  - b. meningitis
  - c. encephalitis
  - d. myelitis
  - e. myocardial infarction
  - f. myocarditis
  - g. pericarditis
  - h. symptomatic congestive heart failure (NYHA class III-IV)
  - i. arterial or deep venous thrombosis or pulmonary embolism



- **[stage 1 only]** Current or imminent requirement for any of the following:
  - a. invasive mechanical ventilation
  - b. ECMO
  - c. mechanical circulatory support
  - d. vasopressor therapy
  - e. commencement of renal replacement therapy at this admission (i.e. not patients on chronic renal replacement therapy).

## Outcomes

### Day 5 Ordinal Outcomes

The 2 ordinal outcomes are assessed at day 5. The first ordinal outcome is a 7-category outcome largely based on oxygen requirements. The highest category that applies on day 5 was assigned. This outcome is referred to as the “pulmonary” ordinal outcome and is defined below:

1. Can independently undertake usual activities with minimal or no symptoms
2. Symptomatic and currently unable to independently undertake usual activities but no need of supplemental oxygen (or not above pre-morbid requirements)
3. Supplemental oxygen (<4 liters/min, or <4 liters/min above pre-morbid requirements)
4. Supplemental oxygen (≥4 liters/min, or ≥4 liters/min above pre-morbid requirements, but not high-flow oxygen)
5. Non-invasive ventilation or high-flow oxygen
6. Invasive ventilation, extracorporeal membrane oxygenation (ECMO), mechanical circulatory support, or new receipt of renal replacement therapy
7. Death

The second ordinal outcome, also assessed at Day 5, captures the range of organ dysfunction that may be associated with progression of Coronavirus-Induced Disease 2019 (COVID-19), such as respiratory dysfunction and coagulation-related complications. Again, the highest category that applies on day 5 was assigned. This outcome is referred to as the “pulmonary+” ordinal outcome. The 7 categories of the pulmonary+ ordinal outcome assessed at Day 5 are:

1. Can independently undertake usual activities with minimal or no symptoms
2. Symptomatic and currently unable to independently undertake usual activities but no need of supplemental oxygen (or not above pre-morbid requirements)
3. Supplemental oxygen (<4 liters/min, or <4 liters/min above pre-morbid requirements)
4. Supplemental oxygen (≥4 liters/min, or ≥4 liters/min above pre-morbid requirements, but not high-flow oxygen) or any of the following: stroke (NIH Stroke Scale [NIHSS] ≤14), meningitis, encephalitis, myelitis, myocardial infarction, myocarditis, pericarditis, new onset CHF NYHA class III or IV or worsening to class III or IV, arterial or deep venous thromboembolic events.
5. Non-invasive ventilation or high-flow oxygen, or signs and symptoms of an acute stroke (NIHSS >14)
6. Invasive ventilation, ECMO, mechanical circulatory support, vasopressor therapy, or new receipt of renal replacement therapy
7. Death

### Primary Endpoint

The primary endpoint is *time from randomization to sustained recovery*, where sustained recovery is defined as being discharged from the index hospitalization, followed by being alive and *home* for 14 consecutive days prior to Day 90.

*Home* is defined as the level of residence or facility where the participant was residing prior to hospital admission leading to enrollment in this trial (the index hospitalization).

Residence or facility groupings to define home are:

- 1) **Independent/community dwelling** with or without help, including house, apartment, undomiciled/homeless, shelter, or hotel;
- 2) **Residential care facility** (e.g., assisted living facility, group home, other non-medical institutional setting);
- 3) **Other healthcare facility** (e.g., skilled nursing facility, acute rehab facility); and
- 4) **Long-term acute care hospital** (hospital aimed at providing intensive, longer term acute care services, often for more than 28 days).

Lower (less intensive) level of residence or facility will also be considered as home. By definition, “home” cannot be a “short-term acute care” facility. Participants previously affiliated with a “long-term acute care” hospital recover when they return to the same or lower level of care.

Readmission from “home” may occur and if this occurs within 14 days of the first discharge to “home”, then the primary endpoint will not be reached until such time as the participant has been at home for 14 consecutive days. Participants residing in a facility solely for public health or quarantine purposes will be considered as residing in the lowest level of required residence had these public health measures not been instated.

#### Primary Safety Endpoint

The primary safety endpoint is assessed at day 5 and day 28. It is defined as a composite of deaths, serious adverse events (SAEs), or grade 3 or 4 AEs. This composite is also expanded to include end organ dysfunction and serious infection events at day 28. These events were exempt from SAE reporting; instead they were reported at the time of discharge from the hospital on an eCRF.

#### Other Safety Outcomes

Clinical adverse events of any grade severity are collected on days 1-7; this information is compared to pre-existing AEs collected prior to infusion to determine incident grade 3 or 4 events. On day 14, incident grade 3 and 4 that occurred between day 7 and day 14 are reported on an eCRF; and on day 28 incident grade 3 and 4 events that occurred between day 14 and day 28 are reported on an eCRF.

Adverse events of any grade during the infusion and 2 hours post-infusion were collected using a checklist of 17 signs and symptoms.

Adverse events were graded for severity using a toxicity table of the Division of AIDS, NIAID.<sup>1</sup> For adverse events not in the table, a generic grading scheme was used. Adverse events were categorized according to codes in the Medical Dictionary for Regulatory Activities (MedDRA®), version 23.1.

Laboratory assessments of biomarkers for various types of organ dysfunction and the host’s inflammatory state were determined at day 0 and day 5.

#### **Sample Size for Ordinal Outcomes Used in Stage 1 to Assess Evidence of Activity**

The sample size of 300 patients for stage 1 was planned to ensure that sufficient information would be available to determine whether sample size and eligibility should be expanded, i.e., whether to move into stage 2. It was assumed the pulmonary and pulmonary+ outcomes at day 5 would be highly correlated. The rationale for a 1-sided type 1 error rate of 0.30 and 95% power are based on previous work and an evaluation of the performance of the 2-stage plan during the planning stage of the protocol. The category percentages in the table below correspond to an odds ratio of 1.60. With these assumptions, total sample size for the comparison of each agent with placebo in stage 1 was 293 patients.<sup>2</sup> This was increased to 300 to allow for some missing data at day 5.

Category percentages assumed in the design for the pulmonary + ordinal outcome are in the table below. Estimates for the placebo + SOC group were obtained from the ACTT-1 trial of remdesivir. These percentages were assumed to be the similar for the pulmonary ordinal outcome at day 5.

| Pulmonary+ Outcome at Day 5            | Percent in Each Category    |               |
|----------------------------------------|-----------------------------|---------------|
|                                        | Investigational Agent + SOC | Placebo + SOC |
| No limiting symptoms due to COVID-19   | 3.2                         | 2.0           |
| Limiting symptoms due to COVID-19      | 53.5                        | 43.0          |
| Moderate end-organ dysfunction         | 20.6                        | 23.0          |
| Serious end-organ dysfunction          | 12.8                        | 17.0          |
| Life threatening end-organ dysfunction | 5.0                         | 7.3           |
| End-organ failure                      | 4.5                         | 7.0           |
| Death                                  | 0.4                         | 0.7           |
| Total                                  | 100.0                       | 100.0         |

### Sample Size to Assess Primary Endpoint

For the primary end point of sustained recovery we estimated that 843 primary events would be accrued if 1,000 patients were followed for 90 days; 843 primary events provides 90% power at the 0.025 (1-sided) level of significance to detect a sustained recovery rate ratio (investigational agent/placebo) of 1.25

### Monitoring Guidelines for the DSMB

Guidelines for advancing an investigational agent from stage 1 to stage 2 were provided to the independent DSMB. The guidelines were defined such that agents that did not meet the criteria for advancing to stage 2 were highly unlikely to demonstrate a statistically significant improvement in sustained recovery at full enrollment.

The guidelines, taken from the protocol, are given below.

- *If the investigational agent is superior (i.e.  $p \leq 0.3$ ) to control for both ordinal intermediate outcomes, then advance agent to stage 2. The decision to advance an investigational agent before stage 1 is fully enrolled may be made at an interim review.*
- *If there is insufficient evidence for superiority versus control (i.e.,  $p > 0.3$ ) in each of the two outcomes, then stop randomization, agent does not continue to stage 2. During stage 1, the decision to stop an investigational agent for futility would typically occur after the stage 1 trial is fully enrolled, and all participants were followed for 5 or more days.*
- *If there is a statistically significant ( $p \leq 0.3$ ) association for one endpoint and not the other, then the agent may or may not advance depending on the risk/benefit profile emerging from the data at this early stage. If the effect estimate for both outcomes is on the side of benefit, the preference would be towards advancing the agent to stage 2, given that the decision to stop the investigational agent can be further considered as part of the planned safety and futility review in stage 2 follow-up.*

*The DSMB will be asked to review whether the discordance is attributable to a positive or negative effect on extra-pulmonary organ dysfunction (the difference in the two ordinal scale categories, the conditions included in pulmonary+ but not in the pulmonary endpoint), and whether the same ordinal outcomes assessed on other days yield similar results, and weigh the risk/benefit profile. For example, if there is a significant positive effect on the pulmonary score and the lack of significant effect on the pulmonary+ score is driven by a lack of difference in the milder thrombotic symptoms in category 4 of the pulmonary+ scale (e.g. deep venous thrombosis) and there is no evidence of any raised risk of thrombosis overall, the agent will advance. Conversely, if the agent is superior to the control group with respect to the pulmonary outcome, but clearly inferior to the control group with respect to the pulmonary+ outcome or has a concerning safety profile, it will not advance. Analyses of “time to sustained recovery”, the stage 2 primary endpoint will also be provided to the DSMB, as supporting information.*

*As a guideline, asymmetric boundaries will be provided to the DSMB to monitor the intermediate (stage 1) endpoint or each pairwise comparison of investigational agent versus control. For monitoring overwhelming benefit of an*

*investigational agent, the Lan-DeMets spending function analogue of the O'Brien-Fleming boundaries will be used. It will be chosen to preserve a 1-sided 0.30 level of significance. For computing the Lan-DeMets boundary, the information fraction at each interim analysis will be the number of participants who have completed 5 days of follow-up for stage 1 (divided by the planned sample size of 300). A Haybittle-Peto boundary using a 2.5 standard deviation (SD) for the first 50 participants enrolled and 2.0 SD afterwards will used as a guideline for harm.*

### **Interim Analyses Conducted for the DSMB**

The independent DSMB reviewed interim data on a regular basis. For LY-CoV555, safety data was limited at the beginning of the trial, therefore an early safety review was conducted after 28 participants had 5 days of follow-up. Subsequently, for LY-CoV555, three full interim data reports were provided to the DSMB. In addition, from September 28 through October 13, 2020, weekly safety updates were provided to the DSMB.

After the DSMB reviewed data from TICO on October 26, 2020 it was recommended that no further participants be randomized to receive LY-CoV555 / placebo, that the current result be unblinded, and that the 90 day follow-up be completed for all participants. Their recommendation was based on a low likelihood that the intervention would be of clinical value in this hospitalized patient population. Neither of the 2 ordinal outcomes favored LY-CoV555 compared to placebo with a p-value  $\leq 0.30$ . The review on October 26 followed a review on October 13, 2020 that led the DSMB to recommend that enrollment be paused until the review on October 26, 2020. The review on October 13 included 211 participants with Day 5 data, and the pause was recommended because the Haybittle-Peto boundary for harm had been crossed.

### **Statistical Methods**

Methods used for summarizing the ordinal outcomes are described in the main body of text. Additional details are provided here for methods used for the safety, time to event, and subgroup analyses. The risk score estimation used for subgroup analyses and for covariate adjustment is also described.

The primary safety analysis compared LY-CoV555 versus placebo for the proportion of participants who had died or experienced SAEs or new grade 3 or 4 AEs by Day 5 using logistic regression adjusting for study pharmacy. Kaplan-Meier estimates were calculated for time to the composite of time to death, SAEs, and grade 3 or 4 AEs and time to death through October 26. Treatment groups were compared using log-rank tests, and hazard ratios (HR) with 95% CIs and p-values were calculated using Cox proportional hazards models, stratified by study pharmacy.

To compare LY-CoV555 versus placebo for time to sustained recovery and for time to hospital discharge, rate ratios (RR) for (sustained) recovery were estimated using Fine-Gray models, stratified by study pharmacy.<sup>3,4</sup> The cumulative incidence functions within each treatment group were estimated using the Aalen-Johansen method, and treatment groups were compared using Gray's test with  $\rho=0$ . The Fine-Gray model, Aalen-Johansen estimates, and Gray's test are analogues of the Cox proportional hazards model, Kaplan-Meier estimates, and the log-rank test, respectively, taking into account the competing risk of death.<sup>5,6</sup> Time to sustained recovery was assessed for the cohort of participants who were randomized up to September 28, because data from the Day 28 visit eCRF was required to ascertain sustained recovery.

The protocol defined a number of baseline-defined subgroup analyses for the primary endpoint of sustained recovery and for the Day 5 and Day 28 primary safety outcome. In this preliminary report subgroups are shown for the Day 5 pulmonary ordinal outcome. Heterogeneity of the treatment effect across subgroups was assessed by including interaction terms between treatment group and baseline subgroups in the proportional odds model for the Day 5 ordinal outcome.

One of the subgrouping factors defined was a disease progression risk score that considered the following factors measured at baseline: age, gender, duration of symptoms, pulmonary ordinal category, NEW score and chronic health conditions. Chronic health conditions included a history of asthma, chronic obstructive pulmonary disease (COPD), diabetes, heart failure, HIV or an immune suppression, hypertension, myocardial infarction, acute coronary syndrome or cerebrovascular accident, malignancy, or renal impairment. The number and percentage of participants with a history of these health conditions at entry are given in Table 1 and Table S1. This risk score was developed by fitting a logistic regression model of Day 5 pulmonary ordinal outcome categories dichotomized according to category  $\geq 5$  versus  $< 5$  (5=noninvasive ventilation or high-flow oxygen; 6= invasive ventilation, ECMO, mechanical circulatory support, or new renal replacement therapy; or 7= death) for both treatment groups combined.

COPD and malignancy covariates were not included because no participants with these medical histories were in the worst 3 ordinal categories at Day 5. The estimated linear predictor from the fitted logistic regression model was used to construct a risk score (probability of being in category 5, 6 or 7 at Day 5) for each participant. The risk score was also used as covariate in selected analyses to adjust for chance baseline imbalances in some of the factors considered to develop the score. The table below summarizes the multiple logistic model with ORs and 95% CIs for the baseline factors considered. There were 61 participants in the 3 worst categories of the pulmonary ordinal outcome at Day 5.

| <b>Baseline Factor</b>                          | <b>Odds Ratio</b> | <b>95% CI</b> |
|-------------------------------------------------|-------------------|---------------|
| Age (per 10 years older)                        | 1.25              | 0.96 - 1.63   |
| Female vs male                                  | 0.51              | 0.25 – 1.05   |
| Symptom duration (per 1 day longer)             | 0.96              | 0.84 – 1.09   |
| NEW score (per 1 point higher)                  | 1.28              | 1.08 – 1.52   |
| Ordinal outcome at entry (per 1 category worse) | 3.19              | 2.14 – 4.75   |
| Asthma vs no history                            | 0.49              | 0.12 – 1.96   |
| Diabetes vs no history                          | 2.22              | 1.04 – 4.76   |
| CVD vs no history                               | 3.23              | 0.66 – 16.0   |
| HIV or immune suppression vs no history         | 2.87              | 0.46 – 18.1   |
| CHF vs no history                               | 0.33              | 0.04 – 3.15   |
| Hypertension vs no history                      | 0.57              | 0.27 – 1.22   |
| Renal impairment vs no history                  | 0.42              | 0.12 – 1.45   |

In a post hoc analysis carried out as result of chance imbalances at entry, the risk score was used as covariate in the analyses of major endpoints (Table S3). In this covariate adjusted analysis the risk score was used as a continuous variable. In subgroup analyses (Table S13), it was divided into 2 groups at the median score.

#### **Data Management and Quality Assurance**

Case reports forms were completed by trained staff at each clinical site, REDCap (Research Electronic Data Capture) was used for electronic data collection at each site. The central database for the trial resided at the Statistical and Data Management Center (SDMC) at the University of Minnesota. It was comprised of a number of database tables in Oracle, from which additional data views and analysis files were created. On a daily basis data queries based on pre-specified edits for clinical sites to address were posted to the INSIGHT study web site. Reports summarizing data quality (e.g., missing data) were posted to the INSIGHT web site and on a regular basis a the protocol team and a committee comprised of ICC and SDMC staff reviewed site quality performance data.

### Section 3: Results

This section briefly summarizes tables and figures included in this supplement. The subheadings in the text of the main paper are used to organize this section.

#### Study Participants

**Figure S1.** 326 participants (169 LY-CoV555, 157 placebo), were randomized, 314 (163, 151) were infused, and 311 (161, 150) have a day 5 ordinal outcome. Through October 26, all participants had been followed for 7 days. The day 7 ordinal outcome is available for 299 (153, 146) participants.

**Table S1.** This tables includes an expanded list of baseline characteristics by treatment group and overall. Some items in Table 1 are also included in Table S1, e.g., history of chronic health conditions, so that the complete list of items collected are shown. The risk score computed and described in Methods was above the median for 52% of participants given LY-CoV555 and 48% of participants given placebo.

**Table S2.** The use of selected treatments was assessed at both baseline and Day 5. These treatments are summarized in Table S2. In both treatment groups the percentage of patients taking antiplatelet/anticoagulation treatment and immune modulating medication was lower at Day 5 than at baseline (Table S1).

#### Completeness of Follow-up

At day 14, an eCRF was completed for 274 participants, 95% of those eligible for the day 14 visit; 156 had a eCRF submitted on day 28, also 95% of those eligible to attend that visit. In the mITT analysis cohort, no participant has withdrawn consent.

#### Efficacy Outcomes

**Table S3.** As a consequence of chance imbalances in baseline characteristics, post-hoc covariate adjustment was carried out using the risk score described in Methods of this supplement. This table compares key test statistics in Table 2 of the manuscript using the protocol-specified analysis for covariate adjustment, no adjustment, and the protocol-specified covariate adjustment plus the risk score considered as a continuous variable. Effect estimates for each outcome, odds ratios (ORs), risk ratios (RRs), or hazard ratios (HRs) are similar with and without these adjustments.

**Table S4.** This table summarizes ORs for a more favorable outcome on LY-CoV555 than placebo for the pulmonary and pulmonary+ ordinal outcomes on days 1-7, day 14 and day 28. ORs are adjusted for the baseline category and study pharmacy. At day 14 and day 28 only the pulmonary ordinal outcome was assessed. All ORs are < 1.0.

**Table S5a.** Association Between the Day 5 Pulmonary Ordinal Outcome and Time to Sustained Recovery.

There is a clear gradient; participants with higher (worse) Pulmonary scores have longer time to recovery compared with patients with lower Pulmonary scores at Day 5 (RR < 1). To help interpret the association between the Pulmonary outcome and time to sustained recovery, Table S5b below describes the time to sustained recovery for participants in each Day 5 Pulmonary category.

The gradients are similar in the LY-CoV555 and placebo groups (p=0.58 for interaction between the treatment group indicator and the Pulmonary categories, p=0.64 for interaction with the continuous Pulmonary Day 5 score).

**Table S5b.** Time to Sustained Recovery by Category of the Day 5 Pulmonary Ordinal Outcome.

There is a clear gradient; participants with higher (worse) Pulmonary scores have longer time to recovery.

### Organ Dysfunction and Serious Infections

**Table S6.** Specific end organ disease events and serious infections through October 26, 2020 are given in this table. These events are collected at the time of hospital discharge or death, an information was available for 152 patient given LY-CoV555 and 141 given placebo.

### Safety Outcomes

**Table S7.** A checklist of 18 signs and symptoms was collected during and 2 hours post-infusion. These events are summarized by severity grade in Table S7. These signs and symptoms were to be reported irrespective of relationship to the LY-CoV555/placebo.

**Table S8.** This table gives the the number and percentage of participants who experienced each component of the composite safety outcome at Day 5. Thirty-one participants experienced at least one event in the LY-CoV555 group; these participants experienced a total of 35 events. In the placebo group, 21 participants experienced at least one event; 23 total events were experienced.

**Table S9.** The table gives the number and percentage of participants who experienced each of the components of the composite safety outcome, an end organ disease event, or a serious co-infection through Day 28. End organ disease events and serious infections are reported at the time of hospital discharge and this information is currently not available for 21 participants, 11 in the LY-CoV555 group and and 10 in the placebo group.

**Figure S2 (A-D).** Kaplan Meier (K-M) plots are shown for 4 outcomes in this panel. Figures S2A and S2C are shown through Day 28 and correspond to the 2 composite safety outcomes summarized in Table 2 of the main report. These events are shown through Day 28 because that is the last visit at which Grade 3 and 4 events are collected.

Figures S2B and S2D show the K-M estimates through the censoring date for analyses in this report (October 26, 2020), up to 50 days. This range covers all deaths that occurred through October 26; the K-M estimate for death corresponds to the last line in Table 2 of the main report. Figure S2D considers the composite outcome of death, SAEs, organ failure events, or serious co-infections. Organ failure and serious co-infections are serious events that were exempted from SAE reporting in TICO since they were reported on other case report forms.

**Table S10.** This table summarizes, by MedDRA system organ class, the events that formed a composite outcome of death, SAEs, or grade 3 or 4 AEs through Day 28. The number and percentage of participants with at least one event in each system organ class is shown. Most events were classified as “Respiratory, Thoracic, Mediastinal” .

**Table S11.** Changes between baseline and Day 5 are given in this table for protocol-required locally determined laboratory markers.

### Subgroup Analyses

**Figure S3.** This figure depicts category percentages of the pulmonary ordinal outcome at Day 5 according to the baseline category of the ordinal outcome. The upper part of this figure is also shown in Figure 1A in the main paper.

**Table S12.** In this table the pulmonary ordinal outcome at Day 5 is classified as “better”, “same”, or “worse” compared to baseline for each baseline category. Over all baseline categories, the percentage in each of these 3 categories was 45% (better), 35% (same), and 20% (worse) for the LY-CoV555 group and 55%, 27% and 18%, respectively, for the placebo group.

**Table S13.** A number of other baseline-defined subgroups besides the ordinal outcome at baseline were pre-specified. These are shown in Table S13 where the Day 5 pulmonary outcome OR is examined for heterogeneity across subgroups. ORs are estimated with a proportional odds model with adjustment for baseline category of the pulmonary ordinal outcome. Interaction p-values for trend across measured values of subgroups are marked with an “\*”. In addition to pre-specified subgroups, post-hoc subgroups according to treatment prescribed at entry and the risk score that was computed are shown.



### Supplementary Appendix References

1. Division of AIDS (DAIDS) Table for Grading the Severity of Adult and Pediatric Adverse Events, Corrected Version 2.1. 2017. (Accessed August 14, 2020, at <https://rsc.niaid.nih.gov/sites/default/files/daidsgradingcorrectedv21.pdf>.)
2. Whitehead J. Sample Size Calculations for Ordered Categorical Data. *Stat Med* 1993; 12:2257-2271.
3. Fine JP, Gray RJ. A Proportional Hazards Model for the Subdistribution of a Competing Risk. *J Am Stat Assoc* 1999;94:496-509.
4. Zhou B, Latouche A, Rocha V, Fine J. Competing risks regression for stratified data. *Biometrics* 2011;67:661-70.
5. Aalen OO, Johansen S. An Empirical Transition Matrix for Non-Homogeneous Markov Chains Based on Censored Observations. *Scandinavian Journal of Statistics* 1978;5:141-50.
6. Gray RJ. A Class of K-Sample Tests for Comparing the Cumulative Incidence of a Competing Risk. *Annals of Statistics* 1988;16:1141-54.

Figure S1: CONSORT diagram

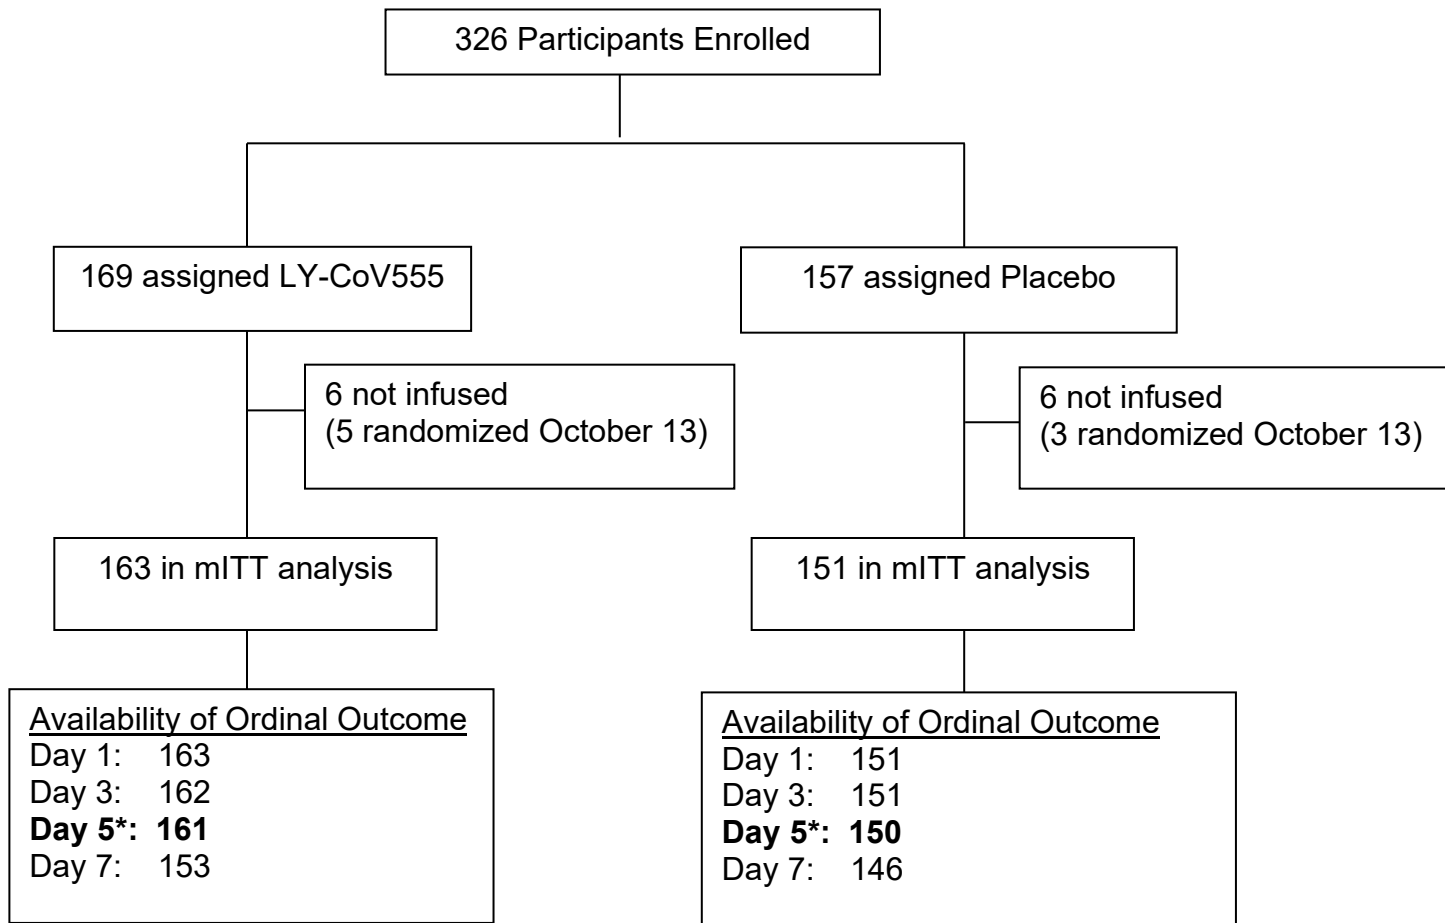

\* Primary measure of efficacy in stage 1; safety outcomes were available for all participants at Day 5. The sustained recovery outcome was missing for 1 participant in the LY-CoV555 group.

**Table S1: Additional Baseline Characteristics by Treatment Group**

| Baseline Characteristic                   |                     | LY-CoV555<br>(n=163) | Placebo<br>(n=151) | Total<br>(n=314) |
|-------------------------------------------|---------------------|----------------------|--------------------|------------------|
| NEW score                                 | Median (IQR)        | 4 (2, 5)             | 3 (2, 6)           | 4 (2, 6)         |
|                                           | No. (%)             |                      |                    |                  |
| <2                                        |                     | 21 (13%)             | 21 (14%)           | 42 (13%)         |
| 2-3                                       |                     | 50 (31%)             | 60 (40%)           | 110 (35%)        |
| 4-5                                       |                     | 52 (32%)             | 30 (20%)           | 82 (26%)         |
| ≥6                                        |                     | 40 (24%)             | 40 (27%)           | 80 (26%)         |
| Modified Borg Dyspnea Scale Score         | No. (%) - available | 160 (98%)            | 145 (96%)          | 305 (97%)        |
| < 1 – nothing or very, very slight        |                     | 35 (22%)             | 30 (21%)           | 65 (21%)         |
| 1 – Very slight                           |                     | 18 (11%)             | 11 (8%)            | 29 (10%)         |
| 2 – Slight                                |                     | 21 (13%)             | 23 (16%)           | 44 (14%)         |
| 3 – Moderate                              |                     | 35 (22%)             | 37 (26%)           | 72 (24%)         |
| 4 – Somewhat severe                       |                     | 22 (14%)             | 12 (8%)            | 34 (11%)         |
| 5 – Severe                                |                     | 9 (6%)               | 13 (9%)            | 22 (7%)          |
| 6 -                                       |                     | 6 (4%)               | 6 (4%)             | 12 (4%)          |
| 7 – Very severe                           |                     | 6 (4%)               | 5 (3%)             | 11 (4%)          |
| 8 -                                       |                     | 3 (2%)               | 6 (4%)             | 9 (3%)           |
| 9 – very, very severe                     |                     | 4 (3%)               | 2 (1%)             | 6 (2%)           |
| 10 – maximal                              |                     | 1 (1%)               | 0 (0%)             | 1 (.3%)          |
| History of any                            | No. (%)             |                      |                    |                  |
| of the below                              |                     | 117 (72%)            | 98 (65%)           | 215 (69%)        |
| Hypertension requiring medication         |                     | 82 (50%)             | 72 (48%)           | 154 (49%)        |
| Diabetes requiring medication             |                     | 54 (33%)             | 36 (24%)           | 90 (29%)         |
| Renal impairment                          |                     | 24 (15%)             | 9 (6%)             | 33 (11%)         |
| Cerebrovascular disease                   |                     | 2 (1%)               | 2 (1%)             | 4 (1%)           |
| MI or acute coronary syndrome             |                     | 7 (4%)               | 3 (2%)             | 10 (3%)          |
| Heart failure                             |                     | 12 (7%)              | 1 (1%)             | 13 (4%)          |
| Asthma                                    |                     | 14 (9%)              | 14 (9%)            | 28 (9%)          |
| COPD                                      |                     | 10 (6%)              | 8 (5%)             | 18 (6%)          |
| HIV or other immunosuppression            |                     | 3 (2%)               | 4 (3%)             | 7 (2%)           |
| Malignancies                              |                     | 7 (4%)               | 5 (3%)             | 12 (4%)          |
| Ongoing use of                            | No. (%)             |                      |                    |                  |
| Antiplatelets/anticoagulants              |                     | 106 (65%)            | 95 (63%)           | 201 (64%)        |
| Aspirin                                   |                     | 30 (18%)             | 28 (19%)           | 58 (19%)         |
| Other antiplatelets                       |                     | 13 (8%)              | 7 (5%)             | 20 (6%)          |
| Heparin in prophylactic doses             |                     | 74 (45%)             | 73 (48%)           | 147 (47%)        |
| Heparin in intermediary and therapy doses |                     | 5 (3%)               | 7 (5%)             | 12 (4%)          |
| Warfarin                                  |                     | 4 (3%)               | 1 (1%)             | 5 (2%)           |
| DOAC                                      |                     | 9 (5%)               | 5 (3%)             | 14 (5%)          |
| Antibiotics                               | No. (%)             | 54 (33%)             | 36 (24%)           | 90 (29%)         |
| IV antibiotics                            |                     | 46 (28%)             | 33 (22%)           | 79 (25%)         |
| Oral antibiotics                          |                     | 13 (8%)              | 10 (7%)            | 23 (7%)          |
| Antivirals                                | No. (%)             | 2 (1%)               | 1 (1%)             | 3 (1%)           |
| Immune modulating medication              | No. (%)             | 93 (57%)             | 86 (57%)           | 179 (57%)        |

|                                                |  |          |          |           |
|------------------------------------------------|--|----------|----------|-----------|
| Corticosteroids                                |  | 80 (49%) | 74 (49%) | 154 (49%) |
| NSAID                                          |  | 17 (10%) | 16 (11)  | 33 (11%)  |
| Antirejection medicines                        |  | 8 (5%)   | 0 (0%)   | 8 (3%)    |
| Immune modulators <sup>1</sup>                 |  | 1 (1%)   | 5 (3%)   | 6 (2%)    |
| Biologics for cancer and/or autoimmune disease |  | 3 (2%)   | 4 (3%)   | 7 (2%)    |

<sup>1</sup> None on IL1, IL6, interferon, and TNF inhibitor; 1 on JAK inhibitor (placebo), and remaining “other types”.

**Table S2: Concomitant Treatments Prescribed at Day 5**

| Concomitant Medication                      | LY-CoV555<br>(n=161) |      | Placebo<br>(n=150) |      | Total<br>(n=311) |      |
|---------------------------------------------|----------------------|------|--------------------|------|------------------|------|
|                                             | No.                  | Pct. | No.                | Pct. | No.              | Pct. |
| Antibiotics                                 | 28                   | 17.5 | 20                 | 13.4 | 48               | 15.5 |
| IV antibiotic                               | 13                   | 8.1  | 10                 | 6.7  | 23               | 7.4  |
| Oral antibiotic                             | 15                   | 9.4  | 11                 | 7.4  | 26               | 8.4  |
| Antifungals                                 | 4                    | 2.5  | 2                  | 1.3  | 6                | 1.9  |
| ACE inhibitor                               | 22                   | 13.8 | 16                 | 10.7 | 38               | 12.3 |
| ARB                                         | 15                   | 9.4  | 14                 | 9.4  | 29               | 9.4  |
| Antiplatelets/anticoagulants                | 74                   | 46.3 | 61                 | 40.9 | 135              | 43.7 |
| Aspirin                                     | 26                   | 16.3 | 24                 | 16.1 | 50               | 16.2 |
| Other antiplatelet                          | 9                    | 5.6  | 6                  | 4.0  | 15               | 4.9  |
| Heparin prophylactic dose                   | 35                   | 21.9 | 33                 | 22.1 | 68               | 22.0 |
| Heparin intermediate dose                   | 5                    | 3.1  | 3                  | 2.0  | 8                | 2.6  |
| Heparin therapeutic dose                    | 5                    | 3.1  | 4                  | 2.7  | 9                | 2.9  |
| Warfarin                                    | 2                    | 1.3  | 1                  | 0.7  | 3                | 1.0  |
| DOAC                                        | 8                    | 5.0  | 6                  | 4.0  | 14               | 4.5  |
| Antiviral                                   | 0                    | 0.0  | 0                  | 0.0  | 0                | 0.0  |
| Immune modulating medication                | 67                   | 41.9 | 66                 | 44.3 | 133              | 43.0 |
| Corticosteroids                             | 59                   | 36.9 | 60                 | 40.3 | 119              | 38.5 |
| NSAID                                       | 3                    | 1.9  | 8                  | 5.4  | 11               | 3.6  |
| Antirejection meds                          | 6                    | 3.8  | 0                  | 0.0  | 6                | 1.9  |
| Immune modulator                            | 1                    | 0.6  | 2                  | 1.3  | 3                | 1.0  |
| Biologic meds for cancer/autoimmune disease | 0                    | 0.0  | 2                  | 1.3  | 2                | 0.6  |

Note - concomitant medications used within the last 24 hours.

**Table S3: Impact of Covariate Adjustment on Major Outcomes**

| Outcome                                                                                                | OR, RR or HR (95%CI)                      | OR, RR or HR (95%CI)                   | OR, RR or HR (95%CI)                                                                                |
|--------------------------------------------------------------------------------------------------------|-------------------------------------------|----------------------------------------|-----------------------------------------------------------------------------------------------------|
| <b>Efficacy Outcomes*</b>                                                                              | <b>Pre-Specified Analysis<sup>1</sup></b> | <b>No adjustment or stratification</b> | <b>Adjustment for baseline risk score in addition to covariates in primary analysis<sup>2</sup></b> |
| Pulmonary ordinal outcome at Day 5 (OR)                                                                | 0.85 <sup>a</sup> (0.56, 1.29)            | 0.82 (0.55, 1.22)                      | 0.86 (0.57, 1.31)                                                                                   |
| Pulmonary+ ordinal outcome at Day 5 (OR)                                                               | 0.87 <sup>a</sup> (0.57, 1.31)            | 0.84 (0.56, 1.24)                      | 0.87 (0.58, 1.33)                                                                                   |
| Sustained recovery through October 26 (RR)                                                             | 1.06 <sup>b</sup> (0.77, 1.47)            | 1.07 (0.78, 1.47)                      | 1.03 (0.73, 1.44)                                                                                   |
| Discharged from hospital through October 26 (RR)                                                       | 0.97 <sup>b</sup> (0.78, 1.20)            | 0.93 (0.75, 1.16)                      | 1.05 (0.84, 1.31)                                                                                   |
| <b>Safety Outcomes**</b>                                                                               |                                           |                                        |                                                                                                     |
| Infusion reactions (OR)                                                                                | 1.64 <sup>c</sup> (0.79, 3.44)            | 1.61 (0.79, 3.25)                      | 1.72 (0.82, 3.62)                                                                                   |
| Composite safety outcome <sup>***</sup> through Day 5 (OR)                                             | 1.56 <sup>c</sup> (0.78, 3.10)            | 1.45 (0.79, 2.66)                      | 1.62 (0.78, 3.40)                                                                                   |
| Composite safety outcome <sup>***</sup> through Day 28 (HR)                                            | 1.22 <sup>d</sup> (0.75, 1.98)            | 1.22 (0.76, 1.97)                      | 1.21 (0.74, 1.98)                                                                                   |
| Composite safety outcome <sup>***</sup> or organ dysfunction or serious infections through Day 28 (HR) | 1.25 <sup>d</sup> (0.81, 1.93)            | 1.30 (0.85, 1.99)                      | 1.24 (0.80, 1.93)                                                                                   |
| Deaths through 26 October 2020 (HR)                                                                    | 2.00 <sup>d</sup> (0.67, 5.99)            | 1.75 (0.59, 5.24)                      | 1.96 (0.64, 5.97)                                                                                   |

\* Estimates greater than 1.0 favor LY-CoV555; estimates <1.0 favor placebo.

\*\* Estimates less than 1.0 favor LY-COV555; estimates > 1.0 favor placebo.

\*\*\* Composite defined as deaths, SAEs, or grade 3 or 4 AEs

<sup>1</sup> Data similar to what is displayed in Table 2 (i.e. the primary, protocol-specified, analysis; i.e. adjusted for baseline ordinal category and site pharmacy.)

<sup>2</sup> The baseline risk score intends to capture in a single score potential risk factors for the presented outcomes; comparison of data in this column with those in two columns to the left informs on the possible effects of differences in patient characteristics between the two arms of the trial at baseline (see section 2 (“Methods”) of this supplement for details on the development of the risk score).

<sup>a</sup> ORs estimated from a proportional odds model adjusted for baseline ordinal category and site pharmacy.

<sup>b</sup> Recovery RR (LY-CoV555/placebo) of cumulative incidence accounting for competing risk of death stratified by site pharmacy.

<sup>c</sup> ORs estimated from a logistic regression model adjusted for site pharmacy.

<sup>d</sup> HRs estimated from a proportional hazards regression model stratified by site pharmacy.

Abbreviations: HR=hazard ratio, OR=odds ratio, RR=recovery rate ratio (sub-distribution hazard ratio with competing risk of death).

**Table S4: Summary of Odds Ratios from Proportional Odds Model by Day of Follow-up for the Pulmonary and Pulmonary+ Ordinal Outcomes by Treatment Group**

| Visit    | No. | Pulmonary Outcome |            |         | Pulmonary+ Outcome |            |         |
|----------|-----|-------------------|------------|---------|--------------------|------------|---------|
|          |     | OR*               | 95% CI     | p-value | OR*                | 95% CI     | p-value |
| Baseline | 314 | 0.86              | 0.57, 1.29 | .45     | 0.86               | 0.57, 1.29 | .45     |
| Day 1    | 314 | 0.76              | 0.48, 1.19 | .23     | 0.75               | 0.48, 1.18 | .21     |
| Day 2    | 314 | 0.67              | 0.43, 1.04 | .08     | 0.70               | 0.45, 1.09 | .12     |
| Day 3    | 313 | 0.61              | 0.40, 0.94 | .03     | 0.63               | 0.41, 0.96 | .03     |
| Day 4    | 313 | 0.79              | 0.52, 1.21 | .29     | 0.81               | 0.53, 1.23 | .31     |
| Day 5    | 311 | 0.85              | 0.56, 1.29 | .45     | 0.87               | 0.57, 1.31 | .50     |
| Day 6    | 298 | 0.75              | 0.49, 1.15 | .19     | 0.76               | 0.49, 1.16 | .20     |
| Day 7    | 299 | 0.84              | 0.55, 1.29 | .43     | 0.85               | 0.55, 1.30 | .45     |
| Day 14** | 276 | 0.87              | 0.55, 1.37 | .54     | -                  | -          | -       |
| Day 28** | 159 | 0.83              | 0.43, 1.63 | .60     | -                  | -          | -       |

\* Summary odds ratio (LY-CoV555/Placebo) of being in a better category, using proportional odds model with adjustment for patient's baseline clinical category and pharmacy.

\*\* The pulmonary+ outcome is not assessed beyond day 7.

**Table S5a. Association Between the Day 5 Pulmonary Ordinal Outcome and Time to Sustained Recovery**

| Predictor                              | RR*  | 95% CI       | P-value |
|----------------------------------------|------|--------------|---------|
| Treatment group (LY-Cov555 vs Placebo) | 0.96 | 0.68 to 1.36 | 0.82    |
| <b>Pulmonary score at Day 5</b>        |      |              | <0.0001 |
| Category 2 vs 1                        | 0.34 | 0.19 to 0.59 | 0.0002  |
| Category 3 vs 1                        | 0.24 | 0.14 to 0.42 | <0.0001 |
| Category 4 vs 1                        | 0.07 | 0.03 to 0.14 | <0.0001 |
| Category 5 vs 1                        | 0.03 | 0.01 to 0.07 | <0.0001 |

\* The recovery rate ratio (RR) was estimated in a Fine-Gray regression model for time to sustained recovery, taking into account the competing risk of death; the RR is the sub-distribution hazard ratio for recovery. The analysis includes 167 participants with Day 28 eCRF data (or  $\geq 28$  days of administrative follow-up); of those, 11 participants died. For this analysis, categories 5-7 were merged, because only few participants were in category 6 on Day 5, and none had died.

**Table S5b. Time to Sustained Recovery by Category of the Day 5 Pulmonary Ordinal Outcome**

| Group                                                                                        | N (%) in Group | Time to Sustained Recovery** |                                                |
|----------------------------------------------------------------------------------------------|----------------|------------------------------|------------------------------------------------|
|                                                                                              |                | Median (days) (95% CI)       | 25 <sup>th</sup> , 75 <sup>th</sup> Percentile |
| Overall                                                                                      |                | 20 (19 to 21)                | 17, 27                                         |
| <b>Pulmonary Categories on Day 5</b>                                                         |                |                              |                                                |
| 1 = Usual activities with minimal/no symptoms                                                | 29 (17%)       | 17 (16 to 18)                | 16, 18                                         |
| 2 = No supplemental oxygen; symptomatic and unable to undertake usual activities             | 43 (26%)       | 18 (17 to 19)                | 17, 22                                         |
| 3 = Supplemental oxygen < 4 L/min*                                                           | 40 (24%)       | 20 (18 to 20)                | 17, 21                                         |
| 4 = Supplemental oxygen $\geq$ 4 L/min*                                                      | 19 (11%)       | 23 -                         | 21, -                                          |
| 5 = Non-invasive ventilation or high-flow oxygen                                             | 30 (18%)       | 34 -                         | 25, -                                          |
| 6 = Invasive ventilation, ECMO, mechanical circulatory support, renal replacement therapy*** | 6 (4%)         | None recovered               |                                                |

\* Compared to pre-morbid use, if applicable

\*\* Median time to sustained recovery, the 95% CI for the median, and the 25<sup>th</sup> and 75<sup>th</sup> percentiles were estimated using a modified Kaplan-Meier estimate to take into account the competing risk of death (for participants who died, time to event was imputed as time to October 26, 2020, the date of administrative censoring); this approach approximates the Aalen-Johansen estimator for the cumulative incidence function of sustained recovery.

\*\*\*No participants died



**Table S6: End Organ Disease Events and Serious Infections through October 26 by Treatment Group**

| Diagnoses                         | LY-CoV555<br>(n =152 *) |      | Placebo<br>(n=141 *) |      |
|-----------------------------------|-------------------------|------|----------------------|------|
|                                   | No.                     | Pct. | No.                  | Pct. |
| Cardiac and vascular dysfunction  |                         |      |                      |      |
| MI                                | 0                       | 0.0  | 0                    | 0.0  |
| CHF NYHA class III or IV          | 0                       | 0.0  | 1                    | 0.7  |
| Hypotension requiring vasopressor | 5                       | 3.3  | 5                    | 3.5  |
| Myocarditis                       | 0                       | 0.0  | 0                    | 0.0  |
| Pericarditis                      | 0                       | 0.0  | 0                    | 0.0  |
| Hematological dysfunction         |                         |      |                      |      |
| Major bleeding event              | 1                       | 0.7  | 0                    | 0.0  |
| DIC                               | 0                       | 0.0  | 0                    | 0.0  |
| Thromboembolic events             | 3                       | 2.0  | 1                    | 0.7  |
| Hepatic dysfunction               |                         |      |                      |      |
| Hepatic dysfunction               | 0                       | 0.0  | 0                    | 0.0  |
| Infection                         |                         |      |                      |      |
| Intercurrent serious coinfection  | 4                       | 2.6  | 4                    | 2.8  |
| Neurologic dysfunction            |                         |      |                      |      |
| Acute delirium                    | 4                       | 2.6  | 1                    | 0.7  |
| Cerebrovascular accident/stroke   | 0                       | 0.0  | 1                    | 0.7  |
| Encephalitis                      | 0                       | 0.0  | 0                    | 0.0  |
| Meningitis                        | 0                       | 0.0  | 0                    | 0.0  |
| Myelitis                          | 0                       | 0.0  | 0                    | 0.0  |
| TIA                               | 0                       | 0.0  | 0                    | 0.0  |
| Renal dysfunction                 |                         |      |                      |      |
| Renal replacement therapy         | 2                       | 1.3  | 0                    | 0.0  |
| Respiratory dysfunction           |                         |      |                      |      |
| Respiratory failure               | 15                      | 9.9  | 15                   | 10.6 |
| Any of above                      | 25                      | 16.4 | 19                   | 13.5 |

\* - N = number of patients with index hospitalization form in the database. Diagnoses associated with clinical organ failure are collected on the index (and readmission, if applicable) hospitalization forms, which are submitted upon hospital discharge.

**Table S7: Signs and Symptoms Reported During and 2 Hours Post-Infusion by Treatment Group**

| Infusion Reaction*           | LY-CoV555<br>(n=163) |                  |                  |                  | Placebo<br>(n=151) |                  |                  |                  |
|------------------------------|----------------------|------------------|------------------|------------------|--------------------|------------------|------------------|------------------|
|                              | Grade 1<br>N (%)     | Grade 2<br>N (%) | Grade 3<br>N (%) | Grade 4<br>N (%) | Grade 1<br>N (%)   | Grade 2<br>N (%) | Grade 3<br>N (%) | Grade 4<br>N (%) |
| Angioedema                   | 0 (0%)               | 0 (0%)           | 0 (0%)           | 0 (0%)           | 0 (0%)             | 0 (0%)           | 0 (0%)           | 0 (0%)           |
| Anaphylaxis                  | 0 (0%)               | 0 (0%)           | 0 (0%)           | 0 (0%)           | 0 (0%)             | 1 (1%)           | 0 (0%)           | 0 (0%)           |
| Bronchospasm                 | 0 (0%)               | 0 (0%)           | 1 (1%)           | 0 (0%)           | 0 (0%)             | 0 (0%)           | 0 (0%)           | 0 (0%)           |
| Chills                       | 2 (1%)               | 1 (1%)           | 2 (1%)           | 1 (1%)           | 0 (0%)             | 3 (2%)           | 0 (0%)           | 0 (0%)           |
| Diarrhea                     | 0 (0%)               | 0 (0%)           | 0 (0%)           | 0 (0%)           | 2 (1%)             | 0 (0%)           | 0 (0%)           | 1 (1%)           |
| Fever                        | 3 (2%)               | 4 (2%)           | 1 (1%)           | 0 (0%)           | 2 (1%)             | 1 (1%)           | 0 (0%)           | 0 (0%)           |
| Headache                     | 2 (1%)               | 0 (0%)           | 1 (1%)           | 0 (0%)           | 0 (0%)             | 1 (1%)           | 1 (1%)           | 0 (0%)           |
| Hypotension                  | 0 (0%)               | 0 (0%)           | 0 (0%)           | 0 (0%)           | 0 (0%)             | 0 (0%)           | 1 (1%)           | 0 (0%)           |
| Pruritus                     | 1 (1%)               | 0 (0%)           | 1 (1%)           | 0 (0%)           | 1 (1%)             | 0 (0%)           | 0 (0%)           | 0 (0%)           |
| Myalgia                      | 0 (0%)               | 0 (0%)           | 1 (1%)           | 1 (1%)           | 0 (0%)             | 0 (0%)           | 0 (0%)           | 0 (0%)           |
| Nausea                       | 0 (0%)               | 2 (1%)           | 1 (1%)           | 0 (0%)           | 1 (1%)             | 0 (0%)           | 0 (0%)           | 1 (1%)           |
| Rash - non-urticarial        | 0 (0%)               | 0 (0%)           | 1 (1%)           | 0 (0%)           | 0 (0%)             | 0 (0%)           | 0 (0%)           | 0 (0%)           |
| Shortness of breath          | 0 (0%)               | 0 (0%)           | 1 (1%)           | 0 (0%)           | 1 (1%)             | 0 (0%)           | 0 (0%)           | 0 (0%)           |
| Tachycardia                  | 1 (1%)               | 0 (0%)           | 1 (1%)           | 0 (0%)           | 0 (0%)             | 0 (0%)           | 1 (1%)           | 0 (0%)           |
| Throat irritation/tightening | 0 (0%)               | 0 (0%)           | 1 (1%)           | 0 (0%)           | 1 (1%)             | 0 (0%)           | 0 (0%)           | 0 (0%)           |
| Urticaria/hives              | 0 (0%)               | 0 (0%)           | 0 (0%)           | 0 (0%)           | 0 (0%)             | 0 (0%)           | 0 (0%)           | 0 (0%)           |
| Vomiting                     | 1 (1%)               | 0 (0%)           | 0 (0%)           | 0 (0%)           | 0 (0%)             | 0 (0%)           | 0 (0%)           | 0 (0%)           |
| Other reaction               | 7 (5%)               | 1 (1%)           | 0 (0%)           | 1 (1%)           | 4 (3%)             | 0 (0%)           | 3 (2%)           | 0 (0%)           |
| Any of above                 | 15 (9%)              | 8 (5%)           | 3 (2%)           | 1 (1%)           | 9 (6%)             | 6 (4%)           | 4 (3%)           | 1 (1%)           |

\* Collected via checklist during and within 2 hours following the completion of the infusion of blinded study medication. Limited to signs and symptoms that are new or increased in grade (as compared to pre-infusion). A participant with multiple *other* reactions is counted once according to highest grade of *other reaction* recorded.

**Table S8: Summary of Components of Primary Safety Outcome at Day 5**

| <b>Composite Safety Outcome and Components through Day 5</b> | <b>LY-CoV555 (n=163)</b> | <b>Placebo (n=151)</b> | <b>OR (95%CI)</b> | <b>P-value</b> |
|--------------------------------------------------------------|--------------------------|------------------------|-------------------|----------------|
| No. (%) with composite safety outcome                        | 31 (19.0)                | 21 (13.9)              | 1.56 (0.78, 3.10) | .20            |
| No. (%) Deaths                                               | 1 (0.6)                  | 0 (0.0)                | -                 | -              |
| No. (%) SAEs                                                 | 4 (2.5)                  | 2 (1.3)                | -                 | -              |
| No. (%) Grade 3 or 4 adverse events                          | 30 (18.4)                | 21 (13.9)              | -                 | -              |

**Table S9: Summary of Components of Primary Safety Outcome, including Organ Failure and Serious Infections at Day 28 by Treatment Group**

| <b>Composite Outcome and Components through Day 28</b>                                          | <b>LY-CoV555 (n=163)</b> | <b>Placebo (n=151)</b> | <b>HR (95%CI)</b> | <b>P-value</b> |
|-------------------------------------------------------------------------------------------------|--------------------------|------------------------|-------------------|----------------|
| No. (%) with composite safety outcome <sup>+</sup> , organ dysfunction, or serious co-infection | 49 (30.1)                | 37 (24.5)              | 1.25 (0.81, 1.93) | .31            |
| No. (%) deaths                                                                                  | 6 (3.7)                  | 4 (2.6)                | -                 | -              |
| No. (%) SAEs                                                                                    | 5 (3.1)                  | 5 (3.3)                | -                 | -              |
| No. (%) Grade 3 or 4 adverse events                                                             | 37 (22.7)                | 27 (17.9)              | -                 | -              |
| No. (%) Organ dysfunction events <sup>++</sup>                                                  | 24 (15.8)                | 18 (12.8)              | -                 | -              |
| No. (%) Serious co-infections <sup>++</sup>                                                     | 4 (2.6)                  | 4 (2.8)                | -                 | -              |

**+ Deaths, SAEs, or grade 3 or 4 AEs.**

**++ Dates of organ dysfunction events and serious infections are reported at the time of hospital discharge or death. These data are currently missing for 11 participants given LY-CoV555 and 10 participants given placebo. All other events are reported through Day 28.**

Figure S2 (A-D): Kaplan-Meier plots for 4 safety outcomes.

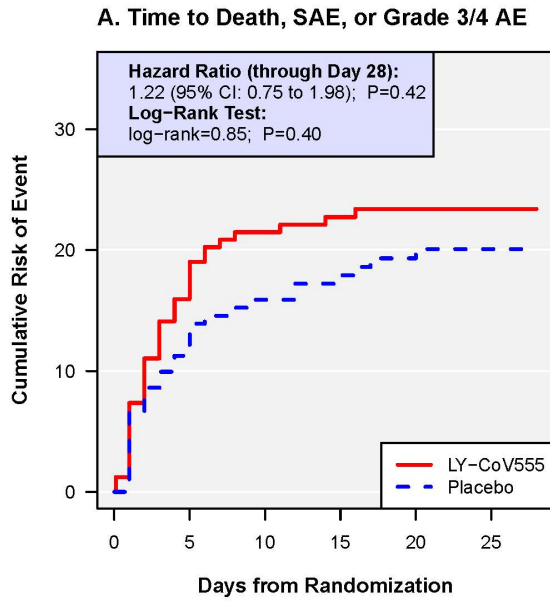

Number at Risk:

|            |     |     |     |     |     |    |
|------------|-----|-----|-----|-----|-----|----|
| LY-CoV555: | 163 | 137 | 127 | 116 | 94  | 81 |
| Placebo:   | 151 | 134 | 127 | 120 | 105 | 90 |

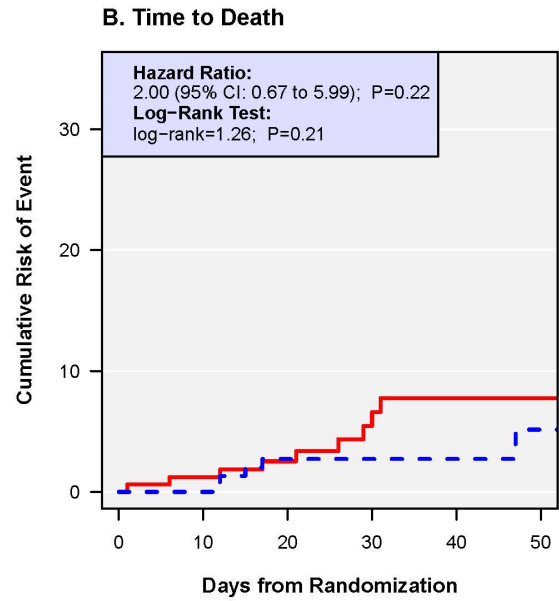

Number at Risk:

|            |     |     |     |    |    |    |
|------------|-----|-----|-----|----|----|----|
| LY-CoV555: | 163 | 160 | 122 | 83 | 52 | 40 |
| Placebo:   | 151 | 151 | 124 | 85 | 56 | 37 |

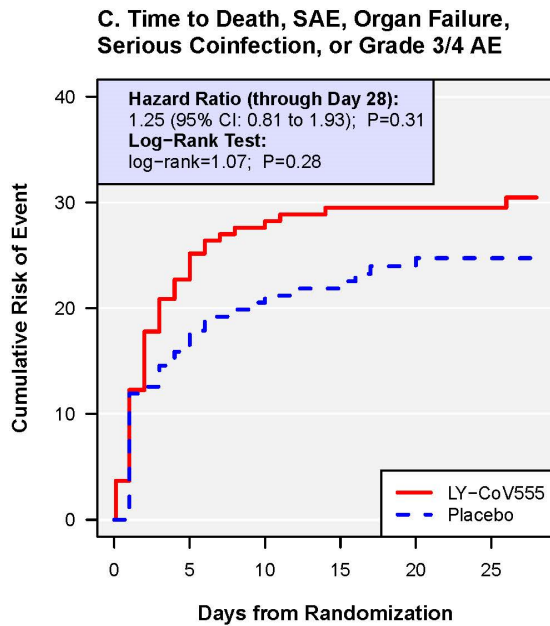

Number at Risk:

|            |     |     |     |     |    |    |
|------------|-----|-----|-----|-----|----|----|
| LY-CoV555: | 163 | 126 | 117 | 105 | 88 | 76 |
| Placebo:   | 151 | 127 | 120 | 113 | 99 | 84 |

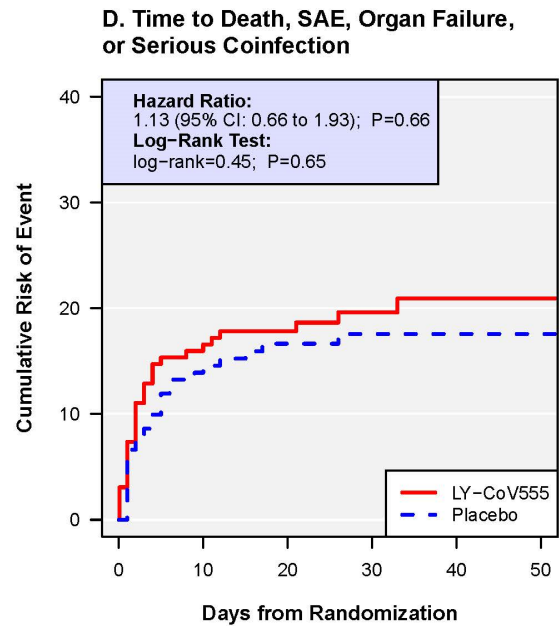

Number at Risk:

|            |     |     |     |    |    |    |
|------------|-----|-----|-----|----|----|----|
| LY-CoV555: | 163 | 136 | 104 | 72 | 47 | 35 |
| Placebo:   | 151 | 130 | 106 | 71 | 50 | 34 |

**Footnote:** Composite outcomes containing grade 3 or 4 AEs (panels A and C) are analyzed through Day 28, because these events are collected only up to Day 28. Hazard ratios are estimated in Cox proportional hazards models; all tests are stratified by study pharmacy.

**Table S10: Deaths, SAEs and New Grade 3 and 4 Adverse Events through Day 28 by MedDRA System Organ Class and Treatment Group**

| System Organ Class (MedDRA SOC)    | LY-CoV555 (n=163 ) |               | Placebo (n=151 ) |               | p-value** |
|------------------------------------|--------------------|---------------|------------------|---------------|-----------|
|                                    | Pts w/ events*     | Pct w/ events | Pts w/ events*   | Pct w/ events |           |
| Blood and Lymphatic System         | 0                  | 0.0           | 2                | 1.3           |           |
| Cardiac                            | 6                  | 3.7           | 2                | 1.3           | .12       |
| Congenital, Familial, Genetic      | 0                  | 0.0           | 0                | 0.0           |           |
| Ear and Labyrinth                  | 0                  | 0.0           | 0                | 0.0           |           |
| Endocrine                          | 0                  | 0.0           | 0                | 0.0           |           |
| Eye                                | 0                  | 0.0           | 0                | 0.0           |           |
| Gastrointestinal                   | 0                  | 0.0           | 5                | 3.3           | .02       |
| General and Administration Site    | 14                 | 8.6           | 8                | 5.3           | .20       |
| Hepatobiliary                      | 0                  | 0.0           | 0                | 0.0           |           |
| Immune System                      | 0                  | 0.0           | 0                | 0.0           |           |
| Infections and Infestations        | 6                  | 3.7           | 4                | 2.6           | .78       |
| Injury, Poisoning, Procedural      | 2                  | 1.2           | 0                | 0.0           |           |
| Investigations                     | 1                  | 0.6           | 1                | 0.7           |           |
| Metabolism and Nutrition           | 8                  | 4.9           | 5                | 3.3           | .42       |
| Musculoskeletal, Connective Tissue | 2                  | 1.2           | 0                | 0.0           |           |
| Neoplasms - Benign and Malignant   | 0                  | 0.0           | 0                | 0.0           |           |
| Nervous System                     | 2                  | 1.2           | 3                | 2.0           | .61       |
| Pregnancy, puerperium, perinatal   | 0                  | 0.0           | 0                | 0.0           |           |
| Psychiatric                        | 9                  | 5.5           | 1                | 0.7           | .01       |
| Renal and Urinary                  | 5                  | 3.1           | 0                | 0.0           | .03       |
| Reproductive System and Breast     | 0                  | 0.0           | 0                | 0.0           |           |
| Respiratory, Thoracic, Mediastinal | 20                 | 12.3          | 16               | 10.6          | .62       |
| Skin and Subcutaneous Tissue       | 0                  | 0.0           | 1                | 0.7           |           |
| Social Circumstances               | 0                  | 0.0           | 0                | 0.0           |           |
| Surgical and Medical Procedures    | 0                  | 0.0           | 0                | 0.0           |           |
| Vascular                           | 5                  | 3.1           | 3                | 2.0           | .50       |
| Any of above                       | 39                 | 23.9          | 30               | 19.9          | .34       |

\* Limited to MedDRA-coded events reported through Day 28

\*\* Cochran-Mantel-Haenszel test stratified by site pharmacy, displayed if no. events is ≥5

**Table S11: Changes in Laboratory Measures from Baseline to Day 5 by Treatment Group**

|                             | Day 5 Means          |                    | Changes from Baseline |                    | Treatment Group Difference |       |         |
|-----------------------------|----------------------|--------------------|-----------------------|--------------------|----------------------------|-------|---------|
|                             | LY-CoV555<br>(n=131) | Placebo<br>(n=137) | LY-CoV555<br>(n=131)  | Placebo<br>(n=137) | Adj.<br>Dif.*              | SE    | p-value |
| Serum creatinine mg/dL      | 1.03                 | 1.02               | -0.12                 | -0.00              | -0.13                      | 0.05  | .007    |
| AST/SGOT U/L                | 38.3                 | 33.2               | -13.3                 | -9.8               | 3.05                       | 3.18  | .34     |
| ALT/SGPT U/L                | 58.1                 | 55.4               | 15.3                  | 14.8               | 1.56                       | 5.72  | .79     |
| WBC $\times 10^9/L$         | 10.19                | 9.71               | 2.28                  | 2.87               | 0.24                       | 0.55  | .66     |
| Hemoglobin g/dL             | 12.9                 | 12.9               | 0.1                   | 0.1                | -0.03                      | 0.16  | .86     |
| Platelets $\times 10^9/L$   | 335.4                | 341.5              | 125.7                 | 126.0              | 0.59                       | 12.99 | .96     |
| Lymphocytes $\times 10^9/L$ | 1.43                 | 1.55               | 0.47                  | 0.61               | -0.04                      | 0.14  | .79     |
| CRP $\log_2$ mg/L           | 4.45                 | 3.99               | -1.88                 | -2.13              | 0.34                       | 0.22  | .12     |

\* Treatment group difference (LY-CoV555 minus Placebo) in Day 5 lab value adjusted for baseline value and study pharmacy.

**Figure S3: Category of Pulmonary Ordinal Outcome at Day 5 According to Category at Baseline by Treatment Group**

**Pulmonary Outcome on Day 5, Distribution Overall and By Baseline Category**

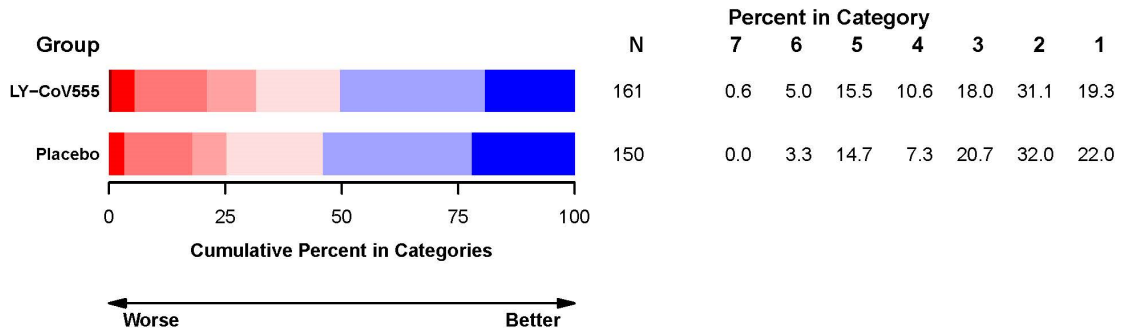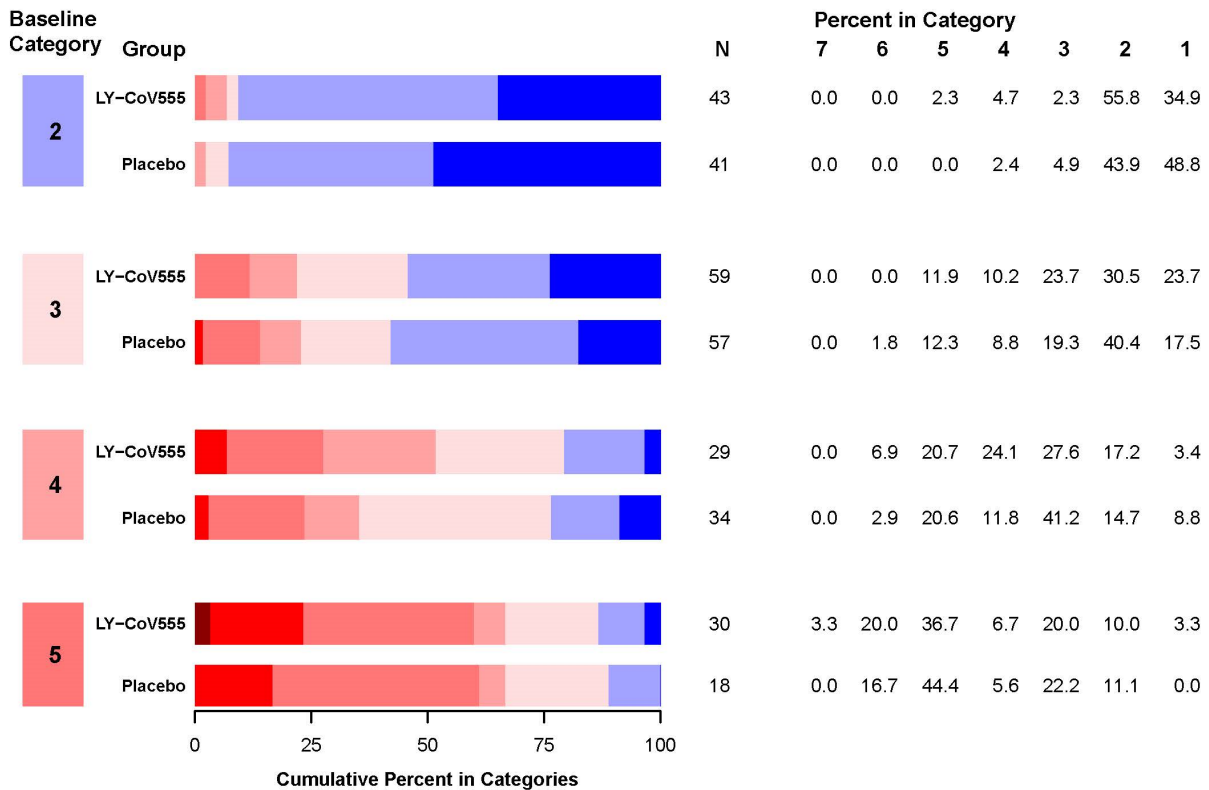

**Category**

- 1 = Can independently undertake usual activities with minimal/no symptoms
- 2 = No supplemental oxygen; symptomatic and unable to independently undertake usual activities
- 3 = Supplemental oxygen < 4 L/min
- 4 = Supplemental oxygen ≥ 4 L/min
- 5 = Non-invasive ventilation or high-flow oxygen
- 6 = Invasive ventilation, ECMO, mech. circ. support, or renal replacement therapy
- 7 = Death





**Table S12: Change in Category of Pulmonary Ordinal Outcome at Day 5 According to Category at Baseline by Treatment Group**

| Baseline Category*                               | LY-CoV555  |              | Placebo    |              |
|--------------------------------------------------|------------|--------------|------------|--------------|
|                                                  | No.        | Pct.         | No.        | Pct.         |
| <b>No oxygen use</b>                             | <b>43</b>  | <b>100.0</b> | <b>41</b>  | <b>100.0</b> |
| Better category on Day 5                         | 15         | 34.9         | 20         | 48.8         |
| Same category on Day 5                           | 24         | 55.8         | 18         | 43.9         |
| Worse category on Day 5                          | 4          | 9.3          | 3          | 7.3          |
| <b>Conventional supplemental O2 &lt; 4 L/min</b> | <b>59</b>  | <b>100.0</b> | <b>57</b>  | <b>100.0</b> |
| Better category on Day 5                         | 32         | 54.2         | 33         | 57.9         |
| Same category on Day 5                           | 14         | 23.7         | 11         | 19.3         |
| Worse category on Day 5                          | 13         | 22.0         | 13         | 22.8         |
| <b>Conventional supplemental O2 ≥ 4 L/min</b>    | <b>29</b>  | <b>100.0</b> | <b>34</b>  | <b>100.0</b> |
| Better category on Day 5                         | 14         | 48.3         | 22         | 64.7         |
| Same category on Day 5                           | 7          | 24.1         | 4          | 11.8         |
| Worse category on Day 5                          | 8          | 27.6         | 8          | 23.5         |
| <b>HFNC or non-invasive ventilation</b>          | <b>30</b>  | <b>100.0</b> | <b>18</b>  | <b>100.0</b> |
| Better category on Day 5                         | 12         | 40.0         | 7          | 38.9         |
| Same category on Day 5                           | 11         | 36.7         | 8          | 44.4         |
| Worse category on Day 5                          | 7          | 23.3         | 3          | 16.7         |
| <b>All participants</b>                          | <b>161</b> | <b>100.0</b> | <b>150</b> | <b>100.0</b> |
| Better category on Day 5                         | 73         | 45.3         | 82         | 54.7         |
| Same category on Day 5                           | 56         | 34.8         | 41         | 27.3         |
| Worse category on Day 5                          | 32         | 19.9         | 27         | 18.0         |

\* Baseline category of ordinal pulmonary endpoint.

**Table S13: Subgroup Analysis for Day 5 Pulmonary Ordinal Outcome**

| Baseline Subgroup                        | LY-CoV555 |       | Placebo |       | Proportional Odds |            |         | Interaction |
|------------------------------------------|-----------|-------|---------|-------|-------------------|------------|---------|-------------|
|                                          | No.       | Score | No.     | Score | OR                | 95% CI     | P-value | P-value     |
| <b>Age* (years)</b>                      |           |       |         |       |                   |            |         |             |
| < 50                                     | 37        | 2.5   | 40      | 2.7   | 1.28              | 0.55, 2.96 | .57     | .30         |
| 50-59                                    | 30        | 3.0   | 39      | 2.8   | 0.80              | 0.32, 1.97 | .63     |             |
| 60-69                                    | 45        | 3.2   | 28      | 2.6   | 0.59              | 0.24, 1.42 | .24     |             |
| 70+                                      | 49        | 2.9   | 43      | 2.7   | 0.80              | 0.38, 1.69 | .56     |             |
| <b>Gender</b>                            |           |       |         |       |                   |            |         |             |
| Male                                     | 96        | 3.0   | 79      | 2.8   | 0.66              | 0.38, 1.15 | .14     | .22         |
| Female                                   | 65        | 2.7   | 71      | 2.6   | 1.05              | 0.57, 1.96 | .87     |             |
| <b>Race</b>                              |           |       |         |       |                   |            |         |             |
| Black                                    | 33        | 2.9   | 34      | 2.5   | 0.60              | 0.25, 1.46 | .26     | .15         |
| Hispanic                                 | 41        | 3.0   | 33      | 3.4   | 1.70              | 0.72, 4.03 | .22     |             |
| White/other                              | 87        | 2.9   | 83      | 2.5   | 0.68              | 0.39, 1.19 | .18     |             |
| <b>Days since symptom onset*</b>         |           |       |         |       |                   |            |         |             |
| ≤ 5                                      | 56        | 2.9   | 44      | 2.6   | 0.91              | 0.43, 1.95 | .82     | .55         |
| 6-8                                      | 45        | 3.0   | 53      | 2.7   | 0.69              | 0.32, 1.48 | .34     |             |
| 9 +                                      | 60        | 2.9   | 53      | 2.8   | 1.11              | 0.56, 2.20 | .76     |             |
| <b>BMI*</b>                              |           |       |         |       |                   |            |         |             |
| < 30                                     | 81        | 2.7   | 66      | 2.5   | 0.86              | 0.47, 1.60 | .64     | .61         |
| 30 - 34.9                                | 35        | 3.1   | 41      | 2.8   | 0.65              | 0.28, 1.51 | .31     |             |
| 35 +                                     | 45        | 3.0   | 42      | 3.0   | 0.89              | 0.41, 1.90 | .76     |             |
| <b>Diabetes</b>                          |           |       |         |       |                   |            |         |             |
| yes                                      | 54        | 3.0   | 36      | 3.5   | 1.40              | 0.64, 3.04 | .40     | .15         |
| no                                       | 107       | 2.9   | 114     | 2.5   | 0.71              | 0.44, 1.16 | .17     |             |
| <b>Hypertension</b>                      |           |       |         |       |                   |            |         |             |
| yes                                      | 82        | 3.0   | 72      | 2.8   | 0.77              | 0.43, 1.37 | .37     | .73         |
| no                                       | 79        | 2.8   | 78      | 2.6   | 0.93              | 0.52, 1.66 | .80     |             |
| <b>Modified Borg dyspnoea scale*</b>     |           |       |         |       |                   |            |         |             |
| 0-2                                      | 73        | 2.6   | 63      | 2.3   | 0.69              | 0.36, 1.32 | .26     | .39         |
| 3+                                       | 85        | 3.2   | 81      | 3.0   | 0.80              | 0.46, 1.40 | .44     |             |
| <b>NEW score*</b>                        |           |       |         |       |                   |            |         |             |
| ≤ 3                                      | 70        | 2.1   | 80      | 2.2   | 0.85              | 0.46, 1.57 | .60     | .38         |
| 4 +                                      | 91        | 3.5   | 70      | 3.3   | 0.80              | 0.46, 1.41 | .45     |             |
| <b>Baseline pulmonary category*</b>      |           |       |         |       |                   |            |         |             |
| Not on supplemental O2                   | 43        | 1.8   | 41      | 1.6   | 0.58              | 0.25, 1.35 | .21     | .78         |
| Sup O2, flow rate < 4 L/min              | 59        | 2.6   | 57      | 2.6   | 1.08              | 0.56, 2.07 | .82     |             |
| Sup O2, flow rate ≥ 4 L/min              | 29        | 3.6   | 34      | 3.3   | 0.64              | 0.26, 1.57 | .33     |             |
| HFNC/non-invasive ventil.                | 30        | 4.4   | 18      | 4.3   | 0.91              | 0.32, 2.61 | .86     |             |
| <b>Remdesivir prior to randomization</b> |           |       |         |       |                   |            |         |             |
| yes                                      | 59        | 2.9   | 66      | 2.8   | 1.03              | 0.54, 1.98 | .92     | .59         |
| no                                       | 102       | 2.9   | 84      | 2.6   | 0.77              | 0.45, 1.31 | .33     |             |
| <b>Corticosteroids</b>                   |           |       |         |       |                   |            |         |             |
| yes                                      | 80        | 3.2   | 74      | 2.8   | 0.65              | 0.36, 1.16 | .14     | .30         |
| no                                       | 81        | 2.6   | 76      | 2.6   | 1.05              | 0.59, 1.87 | .88     |             |
| <b>Risk score*</b>                       |           |       |         |       |                   |            |         |             |
| Above median                             | 84        | 3.6   | 72      | 3.4   | 0.75              | 0.42, 1.33 | .32     | .46         |
| Below median                             | 77        | 2.1   | 78      | 2.1   | 0.98              | 0.54, 1.77 | .95     |             |
